# Supplementary material for: Identification of gene-phenotype connectivity associated with flavanone naringenin by functional network analysis
Source: PeerJ. 2019 Mar 19;7:e6611. doi: 10.7717/peerj.6611 (PMC6430101; doi:10.7717/peerj.6611)
Supplement: Supplemental Information 3 [file peerj-07-6611-s003.xlsx]

## Sheet: Table S3
Table S3. Interactions of 109 naringenin-mediated proteins.
node1	node2	node1_string_internal_id	node2_string_internal_id	node1_external_id	node2_external_id	neighborhood_on_chromosome	gene_fusion	phylogenetic_cooccurrence	homology	coexpression	experimentally_determined_interaction	database_annotated	automated_textmining	combined_score
UBA3	UBE2M	1854105	1844187	9606.ENSP00000354340	9606.ENSP00000253023	0	0	0	0	0.072	0.935	0.9	0.902	0.999
AKT1	PIK3CA	1846136	1845446	9606.ENSP00000270202	9606.ENSP00000263967	0	0	0	0	0.094	0.551	0.9	0.99	0.999
JUN	FOS	1855436	1848822	9606.ENSP00000360266	9606.ENSP00000306245	0	0	0	0	0.522	0.952	0.9	0.99	0.999
UBA3	NEDD8	1854105	1844012	9606.ENSP00000354340	9606.ENSP00000250495	0	0	0	0	0.055	0.905	0.9	0.857	0.998
NCOA1	ESR1	1850298	1842435	9606.ENSP00000320940	9606.ENSP00000206249	0	0	0	0	0	0.939	0.9	0.708	0.998
NCOA2	ESR1	1860191	1842435	9606.ENSP00000399968	9606.ENSP00000206249	0	0	0	0	0	0.941	0.9	0.639	0.997
JUN	MAPK1	1855436	1842512	9606.ENSP00000360266	9606.ENSP00000215832	0	0	0	0	0	0.414	0.9	0.962	0.997
UBE2M	NEDD8	1844187	1844012	9606.ENSP00000253023	9606.ENSP00000250495	0	0	0	0	0.153	0.832	0.9	0.872	0.997
IGF1	IGF1R	1848439	1845984	9606.ENSP00000302665	9606.ENSP00000268035	0	0	0	0	0	0.36	0.9	0.964	0.997
NOS3	AKT1	1847875	1846136	9606.ENSP00000297494	9606.ENSP00000270202	0	0	0	0	0.055	0.606	0.9	0.921	0.996
FOS	MAPK1	1848822	1842512	9606.ENSP00000306245	9606.ENSP00000215832	0	0	0	0	0	0.544	0.9	0.927	0.996
GSTM3	GSTM2	1844453	1843595	9606.ENSP00000256594	9606.ENSP00000241337	0	0	0	0.978	0.089	0.953	0.9	0.868	0.995
GSTM1	GSTT1	1849425	1843934	9606.ENSP00000311469	9606.ENSP00000248935	0	0	0	0	0.053	0	0.9	0.955	0.995
WDR5	KANSL1	1853715	1845137	9606.ENSP00000351446	9606.ENSP00000262419	0	0	0	0	0.053	0.932	0.9	0.168	0.994
IGF1R	PIK3CA	1845984	1845446	9606.ENSP00000268035	9606.ENSP00000263967	0	0	0	0	0.08	0.11	0.9	0.936	0.994
GSTP1	GSTT1	1858630	1843934	9606.ENSP00000381607	9606.ENSP00000248935	0	0	0.209	0	0.054	0	0.9	0.927	0.993
MYC	JUN	1856789	1855436	9606.ENSP00000367207	9606.ENSP00000360266	0	0	0	0	0.054	0.36	0.9	0.899	0.993
SRC	PIK3CA	1853652	1845446	9606.ENSP00000350941	9606.ENSP00000263967	0	0	0	0	0.055	0.11	0.9	0.933	0.993
CCND1	ESR1	1843117	1842435	9606.ENSP00000227507	9606.ENSP00000206249	0	0	0	0	0.042	0.372	0.9	0.896	0.992
NCOR1	ESR1	1846039	1842435	9606.ENSP00000268712	9606.ENSP00000206249	0	0	0	0	0	0.699	0.9	0.783	0.992
SMARCE1	SMARCB1	1850602	1845291	9606.ENSP00000323967	9606.ENSP00000263121	0	0	0	0	0.109	0.833	0.9	0.554	0.992
NCOA2	NCOA3	1860191	1855597	9606.ENSP00000399968	9606.ENSP00000361066	0	0	0	0.895	0.07	0.901	0.9	0.87	0.99
SRC	ESR1	1853652	1842435	9606.ENSP00000350941	9606.ENSP00000206249	0	0	0	0	0	0.424	0.9	0.84	0.99
GSTM1	GSTM2	1849425	1843595	9606.ENSP00000311469	9606.ENSP00000241337	0	0	0	0.986	0.858	0.36	0.9	0.783	0.99
MYC	AKT1	1856789	1846136	9606.ENSP00000367207	9606.ENSP00000270202	0	0	0	0	0.043	0	0.9	0.902	0.989
WDR5	HCFC1	1853715	1849194	9606.ENSP00000351446	9606.ENSP00000309555	0	0	0	0	0.148	0.833	0.9	0.373	0.989
NCOA3	ESR1	1855597	1842435	9606.ENSP00000361066	9606.ENSP00000206249	0	0	0	0	0	0.678	0.9	0.711	0.989
CYP17A1	HSD3B1	1855129	1855017	9606.ENSP00000358903	9606.ENSP00000358421	0.063	0	0	0	0.053	0.152	0.924	0.839	0.989
AKT1	ESR1	1846136	1842435	9606.ENSP00000270202	9606.ENSP00000206249	0	0	0	0	0	0.371	0.9	0.848	0.989
IGF1R	ESR1	1845984	1842435	9606.ENSP00000268035	9606.ENSP00000206249	0	0	0	0	0	0.424	0.9	0.814	0.988
IGF1	PIK3CA	1848439	1845446	9606.ENSP00000302665	9606.ENSP00000263967	0	0	0	0	0	0	0.9	0.892	0.988
JUN	ESR1	1855436	1842435	9606.ENSP00000360266	9606.ENSP00000206249	0	0	0	0	0	0.407	0.9	0.827	0.988
CYP3A4	UGT2B7	1852052	1848674	9606.ENSP00000337915	9606.ENSP00000304811	0.055	0	0	0	0.055	0.36	0.9	0.825	0.988
MYC	MAPK1	1856789	1842512	9606.ENSP00000367207	9606.ENSP00000215832	0	0	0	0	0	0.36	0.9	0.833	0.988
NRIP1	ESR1	1850902	1842435	9606.ENSP00000327213	9606.ENSP00000206249	0	0	0	0	0	0.5	0.9	0.781	0.988
MYC	CCND1	1856789	1843117	9606.ENSP00000367207	9606.ENSP00000227507	0	0	0	0	0.049	0	0.8	0.943	0.988
HSD3B1	HSD17B6	1855017	1850063	9606.ENSP00000358421	9606.ENSP00000318631	0	0	0	0	0	0	0.9	0.882	0.987
PIK3CA	CCND1	1845446	1843117	9606.ENSP00000263967	9606.ENSP00000227507	0	0	0	0	0.063	0	0.9	0.874	0.987
PIK3CA	ESR1	1845446	1842435	9606.ENSP00000263967	9606.ENSP00000206249	0	0	0	0	0	0.36	0.9	0.819	0.987
CYP1A1	GSTM1	1857086	1849425	9606.ENSP00000369050	9606.ENSP00000311469	0	0	0	0	0	0	0.9	0.878	0.987
JUN	CCND1	1855436	1843117	9606.ENSP00000360266	9606.ENSP00000227507	0	0	0	0	0	0	0.9	0.88	0.987
NCOR2	ESR1	1858893	1842435	9606.ENSP00000384018	9606.ENSP00000206249	0	0	0	0	0	0.699	0.9	0.63	0.987
HPGDS	GSTT1	1847557	1843934	9606.ENSP00000295256	9606.ENSP00000248935	0	0	0	0	0.051	0	0.9	0.877	0.987
HSD3B1	CYP19A1	1855017	1844790	9606.ENSP00000358421	9606.ENSP00000260433	0.063	0	0	0	0.28	0.152	0.924	0.742	0.986
IGF1	ESR1	1848439	1842435	9606.ENSP00000302665	9606.ENSP00000206249	0	0	0	0	0.053	0	0.9	0.869	0.986
PRL	ESR1	1848376	1842435	9606.ENSP00000302150	9606.ENSP00000206249	0	0	0	0	0.049	0	0.9	0.868	0.986
CYP3A4	UGT1A1	1852052	1848677	9606.ENSP00000337915	9606.ENSP00000304845	0.055	0	0	0	0.082	0.36	0.9	0.798	0.986
OGT	HCFC1	1855977	1849194	9606.ENSP00000362824	9606.ENSP00000309555	0	0	0	0	0.122	0.774	0.9	0.355	0.985
FOS	CCND1	1848822	1843117	9606.ENSP00000306245	9606.ENSP00000227507	0	0	0	0	0	0	0.9	0.86	0.985
CYP17A1	HSD3B2	1855129	1855019	9606.ENSP00000358903	9606.ENSP00000358424	0.063	0	0	0	0.125	0.152	0.924	0.772	0.985
HSD17B1	HSD17B2	1863967	1842388	9606.ENSP00000466799	9606.ENSP00000199936	0	0	0.48	0	0	0	0.8	0.866	0.984
NOS3	ESR1	1847875	1842435	9606.ENSP00000297494	9606.ENSP00000206249	0	0	0	0	0	0.407	0.9	0.76	0.984
SRC	IGF1	1853652	1848439	9606.ENSP00000350941	9606.ENSP00000302665	0	0	0	0	0	0	0.9	0.848	0.984
ESR2	NCOA1	1852756	1850298	9606.ENSP00000343925	9606.ENSP00000320940	0	0	0	0	0	0.709	0.9	0.466	0.983
CYP1A1	EPHX1	1857086	1846231	9606.ENSP00000369050	9606.ENSP00000272167	0	0	0	0	0.044	0.105	0.9	0.832	0.983
WDR5	TADA3	1853715	1848982	9606.ENSP00000351446	9606.ENSP00000307684	0	0	0	0	0.058	0.781	0.9	0.278	0.983
CYP3A4	UGT1A6	1852052	1848501	9606.ENSP00000337915	9606.ENSP00000303174	0.055	0	0	0	0	0.36	0.9	0.753	0.983
CYP1A1	GSTT1	1857086	1843934	9606.ENSP00000369050	9606.ENSP00000248935	0	0	0	0	0.061	0	0.9	0.836	0.983
BRCA1	ESR1	1861387	1842435	9606.ENSP00000418960	9606.ENSP00000206249	0	0	0	0	0	0.36	0.9	0.749	0.982
NCOA3	NCOA1	1855597	1850298	9606.ENSP00000361066	9606.ENSP00000320940	0	0	0	0.736	0.068	0.784	0.9	0.825	0.982
MYC	ESR1	1856789	1842435	9606.ENSP00000367207	9606.ENSP00000206249	0	0	0	0	0	0.36	0.9	0.746	0.982
CYP17A1	HSD17B6	1855129	1850063	9606.ENSP00000358903	9606.ENSP00000318631	0	0	0	0	0.045	0.095	0.9	0.822	0.982
WDR5	DPY30	1853715	1847527	9606.ENSP00000351446	9606.ENSP00000295066	0	0	0	0	0.054	0.357	0.9	0.749	0.982
HSD17B6	CYP19A1	1850063	1844790	9606.ENSP00000318631	9606.ENSP00000260433	0	0	0	0	0	0.104	0.9	0.822	0.982
NCOA1	NCOR1	1850298	1846039	9606.ENSP00000320940	9606.ENSP00000268712	0	0	0	0	0.168	0.36	0.9	0.703	0.982
FOS	ESR1	1848822	1842435	9606.ENSP00000306245	9606.ENSP00000206249	0	0	0	0	0	0.398	0.9	0.731	0.982
TFF1	ESR1	1847287	1842435	9606.ENSP00000291527	9606.ENSP00000206249	0	0	0	0	0	0.326	0.9	0.74	0.981
HSD17B3	HSD17B2	1856269	1842388	9606.ENSP00000364412	9606.ENSP00000199936	0	0	0.365	0	0	0	0.8	0.866	0.981
IGF1	MAPK1	1848439	1842512	9606.ENSP00000302665	9606.ENSP00000215832	0	0	0	0	0	0	0.9	0.816	0.98
SRC	PELP1	1853652	1848285	9606.ENSP00000350941	9606.ENSP00000301396	0	0	0	0	0	0.4	0.9	0.693	0.98
NCOA3	ESR2	1855597	1852756	9606.ENSP00000361066	9606.ENSP00000343925	0	0	0	0	0	0.678	0.9	0.409	0.979
JUN	NOS3	1855436	1847875	9606.ENSP00000360266	9606.ENSP00000297494	0	0	0	0	0	0	0.9	0.807	0.979
PELP1	ESR1	1848285	1842435	9606.ENSP00000301396	9606.ENSP00000206249	0	0	0	0	0	0.378	0.9	0.703	0.979
NCOA2	ESR2	1860191	1852756	9606.ENSP00000399968	9606.ENSP00000343925	0	0	0	0	0	0.694	0.9	0.364	0.978
AKR1C1	AKR1D1	1857297	1843626	9606.ENSP00000370254	9606.ENSP00000242375	0	0	0.527	0.969	0.053	0.774	0.9	0.252	0.977
AKR1C3	AKR1D1	1857244	1843626	9606.ENSP00000369927	9606.ENSP00000242375	0	0	0.527	0.966	0.053	0.774	0.9	0.192	0.977
MYC	PIK3CA	1856789	1845446	9606.ENSP00000367207	9606.ENSP00000263967	0	0	0	0	0	0.042	0.9	0.782	0.977
GSTP1	EPHX1	1858630	1846231	9606.ENSP00000381607	9606.ENSP00000272167	0	0	0	0	0.049	0	0.9	0.774	0.976
NCOA3	NCOR1	1855597	1846039	9606.ENSP00000361066	9606.ENSP00000268712	0	0	0	0	0.073	0.36	0.9	0.643	0.976
JUN	MAPK11	1855436	1851615	9606.ENSP00000360266	9606.ENSP00000333685	0	0	0	0	0	0.436	0.9	0.612	0.976
NCOA3	CCND1	1855597	1843117	9606.ENSP00000361066	9606.ENSP00000227507	0	0	0	0	0	0.36	0.9	0.662	0.976
KANSL2	KANSL1	1861156	1845137	9606.ENSP00000415436	9606.ENSP00000262419	0	0	0	0	0.054	0.361	0.9	0.655	0.976
AKR1C1	DHDH	1857297	1842829	9606.ENSP00000370254	9606.ENSP00000221403	0.067	0	0	0	0.1	0	0.8	0.878	0.976
AKR1C1	AKR1C3	1857297	1857244	9606.ENSP00000370254	9606.ENSP00000369927	0	0	0.527	0.987	0	0.774	0.9	0.817	0.976
SRD5A1	AKR1D1	1846366	1843626	9606.ENSP00000274192	9606.ENSP00000242375	0	0	0	0	0.053	0	0.924	0.689	0.975
GSTP1	CYP1A1	1858630	1857086	9606.ENSP00000381607	9606.ENSP00000369050	0	0	0	0	0.042	0.063	0.9	0.749	0.974
CYP1A1	HPGDS	1857086	1847557	9606.ENSP00000369050	9606.ENSP00000295256	0	0	0	0	0	0.063	0.9	0.744	0.973
MAPK1	ESR1	1842512	1842435	9606.ENSP00000215832	9606.ENSP00000206249	0	0	0	0	0	0.399	0.9	0.596	0.973
NRIP1	NCOA1	1850902	1850298	9606.ENSP00000327213	9606.ENSP00000320940	0	0	0	0	0	0.145	0.9	0.701	0.972
GSTM1	EPHX1	1849425	1846231	9606.ENSP00000311469	9606.ENSP00000272167	0	0	0	0	0.098	0	0.9	0.717	0.972
NCOR2	AKT1	1858893	1846136	9606.ENSP00000384018	9606.ENSP00000270202	0	0	0	0	0.054	0.36	0.9	0.591	0.972
GSTM3	GSTT1	1844453	1843934	9606.ENSP00000256594	9606.ENSP00000248935	0	0	0	0	0	0	0.9	0.733	0.972
HSD3B2	CYP19A1	1855019	1844790	9606.ENSP00000358424	9606.ENSP00000260433	0.063	0	0	0	0.053	0.152	0.924	0.576	0.971
NCOA2	NCOR1	1860191	1846039	9606.ENSP00000399968	9606.ENSP00000268712	0	0	0	0	0.211	0	0.9	0.663	0.971
HSD3B2	CYP11B1	1855019	1847352	9606.ENSP00000358424	9606.ENSP00000292427	0.063	0	0	0	0.053	0.152	0.924	0.574	0.971
EPHX1	GSTT1	1846231	1843934	9606.ENSP00000272167	9606.ENSP00000248935	0	0	0	0	0.055	0	0.9	0.721	0.971
NCOR2	NCOA3	1858893	1855597	9606.ENSP00000384018	9606.ENSP00000361066	0	0	0	0	0	0.378	0.9	0.574	0.971
HSD17B3	CYP17A1	1856269	1855129	9606.ENSP00000364412	9606.ENSP00000358903	0	0	0	0	0.054	0	0.9	0.714	0.97
GSTA1	GSTT1	1851878	1843934	9606.ENSP00000335620	9606.ENSP00000248935	0	0	0	0	0.052	0	0.9	0.707	0.969
MED1	ESR1	1848202	1842435	9606.ENSP00000300651	9606.ENSP00000206249	0	0	0	0	0.052	0.432	0.9	0.504	0.969
HSD17B1	CYP19A1	1863967	1844790	9606.ENSP00000466799	9606.ENSP00000260433	0	0	0	0	0.055	0.07	0.9	0.689	0.969
GSTT1	GSTM2	1843934	1843595	9606.ENSP00000248935	9606.ENSP00000241337	0	0	0	0	0.053	0	0.9	0.701	0.969
SRC	MAPK1	1853652	1842512	9606.ENSP00000350941	9606.ENSP00000215832	0	0	0.335	0.668	0.053	0.509	0.9	0.91	0.968
SRC	AKT1	1853652	1846136	9606.ENSP00000350941	9606.ENSP00000270202	0	0	0.378	0.622	0.054	0.429	0.9	0.961	0.967
CYP1A1	UGT1A6	1857086	1848501	9606.ENSP00000369050	9606.ENSP00000303174	0.055	0	0	0	0.044	0	0.9	0.685	0.967
CYP1A1	UGT1A1	1857086	1848677	9606.ENSP00000369050	9606.ENSP00000304845	0.055	0	0	0	0.054	0	0.9	0.68	0.967
NCOA1	MED1	1850298	1848202	9606.ENSP00000320940	9606.ENSP00000300651	0	0	0	0	0.055	0	0.9	0.685	0.967
HSD17B3	HSD3B1	1856269	1855017	9606.ENSP00000364412	9606.ENSP00000358421	0	0	0	0	0.06	0	0.9	0.676	0.966
COMT	CYP1B1	1854135	1844805	9606.ENSP00000354511	9606.ENSP00000260630	0.049	0	0	0	0.054	0	0.9	0.667	0.966
HSD3B2	HSD17B6	1855019	1850063	9606.ENSP00000358424	9606.ENSP00000318631	0	0	0	0	0	0	0.9	0.677	0.966
ESR2	NOS3	1852756	1847875	9606.ENSP00000343925	9606.ENSP00000297494	0	0	0	0	0	0.084	0.9	0.66	0.966
AKR1C1	HSD3B1	1857297	1855017	9606.ENSP00000370254	9606.ENSP00000358421	0.052	0	0	0	0.096	0	0.924	0.511	0.964
UGT1A9	CYP3A4	1853090	1852052	9606.ENSP00000346768	9606.ENSP00000337915	0.055	0	0	0	0	0	0.9	0.658	0.964
NCOA2	NCOR2	1860191	1858893	9606.ENSP00000399968	9606.ENSP00000384018	0	0	0	0	0	0	0.9	0.659	0.964
NR0B1	ESR1	1856959	1842435	9606.ENSP00000368253	9606.ENSP00000206249	0	0	0	0	0.055	0.36	0.9	0.475	0.964
NCOA2	NCOA1	1860191	1850298	9606.ENSP00000399968	9606.ENSP00000320940	0	0	0	0.774	0.222	0.483	0.9	0.787	0.964
HSD17B3	HSD3B2	1856269	1855019	9606.ENSP00000364412	9606.ENSP00000358424	0	0	0	0	0.06	0	0.9	0.65	0.964
CYP1A1	COMT	1857086	1854135	9606.ENSP00000369050	9606.ENSP00000354511	0.049	0	0	0	0.054	0	0.9	0.639	0.963
HSD3B1	CYP11B1	1855017	1847352	9606.ENSP00000358421	9606.ENSP00000292427	0.063	0	0	0	0.053	0.152	0.924	0.462	0.963
UGT1A3	CYP3A4	1861363	1852052	9606.ENSP00000418532	9606.ENSP00000337915	0.055	0	0	0	0.102	0	0.9	0.611	0.962
NCOA2	MED1	1860191	1848202	9606.ENSP00000399968	9606.ENSP00000300651	0	0	0	0	0.055	0	0.9	0.63	0.962
HPGDS	EPHX1	1847557	1846231	9606.ENSP00000295256	9606.ENSP00000272167	0	0	0	0	0	0	0.9	0.63	0.961
NR0B2	ESR1	1844279	1842435	9606.ENSP00000254227	9606.ENSP00000206249	0	0	0	0	0	0.407	0.9	0.409	0.961
AKR1C3	SRD5A1	1857244	1846366	9606.ENSP00000369927	9606.ENSP00000274192	0	0	0	0	0.053	0	0.924	0.505	0.961
NCOA3	MED1	1855597	1848202	9606.ENSP00000361066	9606.ENSP00000300651	0	0	0	0	0	0	0.9	0.63	0.961
NCOA3	NRIP1	1855597	1850902	9606.ENSP00000361066	9606.ENSP00000327213	0	0	0	0	0	0	0.9	0.628	0.961
GSTM1	CYP1B1	1849425	1844805	9606.ENSP00000311469	9606.ENSP00000260630	0	0	0	0	0	0	0.9	0.629	0.961
UGT1A4	CYP3A4	1855898	1852052	9606.ENSP00000362508	9606.ENSP00000337915	0.055	0	0	0	0.08	0	0.9	0.607	0.961
UGT1A1	CYP3A5	1848677	1842950	9606.ENSP00000304845	9606.ENSP00000222982	0.055	0	0	0	0.055	0	0.9	0.609	0.96
ESR2	DDX54	1852756	1850587	9606.ENSP00000343925	9606.ENSP00000323858	0	0	0	0	0	0.285	0.9	0.485	0.959
MYC	NCOR1	1856789	1846039	9606.ENSP00000367207	9606.ENSP00000268712	0	0	0	0	0	0.326	0.9	0.442	0.959
CYP1B1	GSTT1	1844805	1843934	9606.ENSP00000260630	9606.ENSP00000248935	0	0	0	0	0.061	0	0.9	0.595	0.958
HSD17B6	CYP11B1	1850063	1847352	9606.ENSP00000318631	9606.ENSP00000292427	0	0	0	0	0	0.095	0.9	0.574	0.958
CYP19A1	HSD17B7	1844790	1844300	9606.ENSP00000260433	9606.ENSP00000254521	0	0	0	0	0.055	0.377	0.9	0.383	0.958
CYP1A1	HSD17B6	1857086	1850063	9606.ENSP00000369050	9606.ENSP00000318631	0	0	0	0	0.042	0.095	0.9	0.573	0.958
NCOR2	MED1	1858893	1848202	9606.ENSP00000384018	9606.ENSP00000300651	0	0	0	0	0	0.326	0.9	0.414	0.957
AKR1C3	HSD3B2	1857244	1855019	9606.ENSP00000369927	9606.ENSP00000358424	0.052	0	0	0	0.096	0	0.924	0.427	0.957
GSTP1	CYP1B1	1858630	1844805	9606.ENSP00000381607	9606.ENSP00000260630	0	0	0	0	0	0.063	0.9	0.574	0.956
CYP3A4	HPGDS	1852052	1847557	9606.ENSP00000337915	9606.ENSP00000295256	0	0	0	0	0	0.054	0.9	0.574	0.956
UGT1A6	CYP3A5	1848501	1842950	9606.ENSP00000303174	9606.ENSP00000222982	0.055	0	0	0	0	0	0.9	0.579	0.956
HCFC1	DPY30	1849194	1847527	9606.ENSP00000309555	9606.ENSP00000295066	0	0	0	0	0.053	0.503	0.9	0.18	0.956
CYP1A1	GSTM3	1857086	1844453	9606.ENSP00000369050	9606.ENSP00000256594	0	0	0	0	0	0	0.9	0.575	0.955
CYP1A1	UGT1A7	1857086	1855901	9606.ENSP00000369050	9606.ENSP00000362525	0.055	0	0	0	0.054	0	0.9	0.565	0.955
NCOR2	NCOA1	1858893	1850298	9606.ENSP00000384018	9606.ENSP00000320940	0	0	0	0	0	0	0.9	0.575	0.955
NR0B1	ESR2	1856959	1852756	9606.ENSP00000368253	9606.ENSP00000343925	0	0	0	0	0	0.36	0.9	0.367	0.955
AKR1C3	HSD3B1	1857244	1855017	9606.ENSP00000369927	9606.ENSP00000358421	0.052	0	0	0	0.096	0	0.924	0.398	0.955
HSD17B6	AKR1D1	1850063	1843626	9606.ENSP00000318631	9606.ENSP00000242375	0	0	0	0	0.216	0	0.9	0.483	0.955
HSD17B3	SRD5A1	1856269	1846366	9606.ENSP00000364412	9606.ENSP00000274192	0	0	0	0	0	0	0.9	0.578	0.955
OGT	WDR5	1855977	1853715	9606.ENSP00000362824	9606.ENSP00000351446	0	0	0	0	0.062	0.27	0.9	0.429	0.955
CYP3A4	EPHX1	1852052	1846231	9606.ENSP00000337915	9606.ENSP00000272167	0	0	0	0	0.055	0.105	0.9	0.523	0.954
EPHX1	CYP1B1	1846231	1844805	9606.ENSP00000272167	9606.ENSP00000260630	0	0	0	0	0	0.105	0.9	0.532	0.954
CYP3A4	HSD17B6	1852052	1850063	9606.ENSP00000337915	9606.ENSP00000318631	0	0	0	0	0.066	0.095	0.9	0.529	0.954
UGT1A6	CYP1B1	1848501	1844805	9606.ENSP00000303174	9606.ENSP00000260630	0.055	0	0	0	0	0	0.9	0.542	0.953
AKR1C1	SRD5A1	1857297	1846366	9606.ENSP00000370254	9606.ENSP00000274192	0	0	0	0	0.053	0	0.924	0.409	0.953
KANSL2	MCRS1	1861156	1853470	9606.ENSP00000415436	9606.ENSP00000349640	0	0	0	0	0.065	0.094	0.9	0.519	0.953
KANSL2	KANSL3	1861156	1859962	9606.ENSP00000415436	9606.ENSP00000396749	0	0	0	0	0.054	0.094	0.9	0.524	0.953
KAT8	KANSL1	1860574	1845137	9606.ENSP00000406037	9606.ENSP00000262419	0	0	0	0	0.064	0.446	0.9	0.212	0.953
UGT2B7	CYP3A5	1848674	1842950	9606.ENSP00000304811	9606.ENSP00000222982	0.055	0	0	0	0.055	0	0.9	0.542	0.953
PELP1	PIK3CA	1848285	1845446	9606.ENSP00000301396	9606.ENSP00000263967	0	0	0	0	0.049	0	0.9	0.541	0.952
SMARCB1	CCND1	1845291	1843117	9606.ENSP00000263121	9606.ENSP00000227507	0	0	0	0	0	0	0.9	0.549	0.952
SRC	IGF1R	1853652	1845984	9606.ENSP00000350941	9606.ENSP00000268035	0	0	0	0.737	0.054	0.399	0.9	0.853	0.952
NRIP1	MED1	1850902	1848202	9606.ENSP00000327213	9606.ENSP00000300651	0	0	0	0	0	0	0.9	0.54	0.952
KANSL3	KANSL1	1859962	1845137	9606.ENSP00000396749	9606.ENSP00000262419	0	0	0	0	0.14	0.094	0.9	0.455	0.951
ESR2	MED1	1852756	1848202	9606.ENSP00000343925	9606.ENSP00000300651	0	0	0	0	0.052	0.432	0.9	0.211	0.951
CYP1A1	UGT1A4	1857086	1855898	9606.ENSP00000369050	9606.ENSP00000362508	0.055	0	0	0	0.045	0	0.9	0.521	0.951
UGT1A7	CYP3A4	1855901	1852052	9606.ENSP00000362525	9606.ENSP00000337915	0.055	0	0	0	0.055	0	0.9	0.52	0.951
HSD17B3	CYP19A1	1856269	1844790	9606.ENSP00000364412	9606.ENSP00000260433	0	0	0	0	0.052	0	0.9	0.525	0.951
CYP17A1	SRD5A1	1855129	1846366	9606.ENSP00000358903	9606.ENSP00000274192	0	0	0	0	0.045	0	0.9	0.534	0.951
ESR2	NR0B2	1852756	1844279	9606.ENSP00000343925	9606.ENSP00000254227	0	0	0	0	0.052	0.402	0.9	0.25	0.951
UGT1A3	CYP1A1	1861363	1857086	9606.ENSP00000418532	9606.ENSP00000369050	0.055	0	0	0	0.054	0	0.9	0.512	0.95
CYP19A1	HSD17B2	1844790	1842388	9606.ENSP00000260433	9606.ENSP00000199936	0	0	0	0	0	0.104	0.9	0.496	0.95
CYP17A1	HSD17B2	1855129	1842388	9606.ENSP00000358903	9606.ENSP00000199936	0	0	0	0	0	0.095	0.9	0.5	0.95
CYP1A1	HSD3B1	1857086	1855017	9606.ENSP00000369050	9606.ENSP00000358421	0.063	0	0	0	0.053	0.152	0.924	0.259	0.95
CYP3A4	GSTT1	1852052	1843934	9606.ENSP00000337915	9606.ENSP00000248935	0	0	0	0	0.061	0	0.9	0.512	0.95
CYP1A1	GSTA1	1857086	1851878	9606.ENSP00000369050	9606.ENSP00000335620	0	0	0	0	0	0.063	0.9	0.512	0.95
NCOA3	TFF1	1855597	1847287	9606.ENSP00000361066	9606.ENSP00000291527	0	0	0	0	0	0.326	0.9	0.305	0.949
NCOR2	NRIP1	1858893	1850902	9606.ENSP00000384018	9606.ENSP00000327213	0	0	0	0	0	0	0.9	0.516	0.949
HSD3B2	SRD5A1	1855019	1846366	9606.ENSP00000358424	9606.ENSP00000274192	0	0	0	0	0.055	0	0.9	0.51	0.949
HSD3B1	SRD5A1	1855017	1846366	9606.ENSP00000358421	9606.ENSP00000274192	0	0	0	0	0.055	0	0.9	0.512	0.949
JUN	SMARCB1	1855436	1845291	9606.ENSP00000360266	9606.ENSP00000263121	0	0	0	0	0	0.397	0.9	0.231	0.949
HSD3B1	AKR1D1	1855017	1843626	9606.ENSP00000358421	9606.ENSP00000242375	0.052	0	0	0	0.096	0	0.924	0.309	0.949
CYP1A1	HSD3B2	1857086	1855019	9606.ENSP00000369050	9606.ENSP00000358424	0.063	0	0	0	0.053	0.152	0.924	0.245	0.949
HSD3B1	HSD17B2	1855017	1842388	9606.ENSP00000358421	9606.ENSP00000199936	0	0	0	0	0.07	0	0.9	0.498	0.949
MED1	NCOR1	1848202	1846039	9606.ENSP00000300651	9606.ENSP00000268712	0	0	0	0	0	0	0.9	0.506	0.948
UGT2B15	CYP3A5	1852407	1842950	9606.ENSP00000341045	9606.ENSP00000222982	0.055	0	0	0	0.055	0	0.9	0.488	0.948
CYP3A4	GSTM1	1852052	1849425	9606.ENSP00000337915	9606.ENSP00000311469	0	0	0	0	0	0	0.9	0.504	0.948
UGT1A10	CYP3A4	1852746	1852052	9606.ENSP00000343838	9606.ENSP00000337915	0.055	0	0	0	0.055	0	0.9	0.489	0.948
CYP1A1	UGT1A10	1857086	1852746	9606.ENSP00000369050	9606.ENSP00000343838	0.055	0	0	0	0.054	0	0.9	0.49	0.948
CYP1A1	GSTM2	1857086	1843595	9606.ENSP00000369050	9606.ENSP00000241337	0	0	0	0	0	0	0.9	0.5	0.947
CYP1A1	UGT1A9	1857086	1853090	9606.ENSP00000369050	9606.ENSP00000346768	0.055	0	0	0	0.044	0	0.9	0.49	0.947
UGT1A1	CYP1B1	1848677	1844805	9606.ENSP00000304845	9606.ENSP00000260630	0.055	0	0	0	0.045	0	0.9	0.491	0.947
DDX54	ESR1	1850587	1842435	9606.ENSP00000323858	9606.ENSP00000206249	0	0	0	0	0	0.285	0.9	0.331	0.947
PIK3CA	MAPK1	1845446	1842512	9606.ENSP00000263967	9606.ENSP00000215832	0	0	0	0	0.127	0.17	0	0.932	0.947
KAT8	WDR5	1860574	1853715	9606.ENSP00000406037	9606.ENSP00000351446	0	0	0	0	0.099	0.367	0.9	0.185	0.947
SRD5A1	HSD17B2	1846366	1842388	9606.ENSP00000274192	9606.ENSP00000199936	0	0	0	0	0.051	0	0.9	0.486	0.947
HPGDS	CYP1B1	1847557	1844805	9606.ENSP00000295256	9606.ENSP00000260630	0	0	0	0	0	0.063	0.9	0.482	0.947
HSD3B2	CYP3A4	1855019	1852052	9606.ENSP00000358424	9606.ENSP00000337915	0.063	0	0	0	0.053	0.152	0.924	0.215	0.947
HSD3B2	HSD17B2	1855019	1842388	9606.ENSP00000358424	9606.ENSP00000199936	0	0	0	0	0	0	0.9	0.492	0.947
HSD17B6	SRD5A1	1850063	1846366	9606.ENSP00000318631	9606.ENSP00000274192	0	0	0	0	0.053	0	0.9	0.48	0.946
HSD3B1	CYP3A4	1855017	1852052	9606.ENSP00000358421	9606.ENSP00000337915	0.063	0	0	0	0.053	0.152	0.924	0.196	0.945
NCOR2	NCOR1	1858893	1846039	9606.ENSP00000384018	9606.ENSP00000268712	0	0	0	0.726	0	0.36	0.9	0.706	0.945
IGF1R	MAPK1	1845984	1842512	9606.ENSP00000268035	9606.ENSP00000215832	0	0	0	0.628	0.053	0.292	0.9	0.688	0.945
GSTT1	CYP3A5	1843934	1842950	9606.ENSP00000248935	9606.ENSP00000222982	0	0	0	0	0.061	0	0.9	0.462	0.945
EPHX1	GSTM3	1846231	1844453	9606.ENSP00000272167	9606.ENSP00000256594	0	0	0	0	0.098	0	0.9	0.441	0.945
SRD5A1	CYP19A1	1846366	1844790	9606.ENSP00000274192	9606.ENSP00000260433	0	0	0	0	0.052	0	0.9	0.469	0.945
HSD17B1	HSD17B7	1863967	1844300	9606.ENSP00000466799	9606.ENSP00000254521	0	0	0	0	0	0	0.8	0.734	0.944
HSD17B6	CYP1B1	1850063	1844805	9606.ENSP00000318631	9606.ENSP00000260630	0	0	0	0	0	0.095	0.9	0.44	0.944
MCRS1	KANSL1	1853470	1845137	9606.ENSP00000349640	9606.ENSP00000262419	0	0	0	0	0.054	0.094	0.9	0.433	0.944
KANSL2	WDR5	1861156	1853715	9606.ENSP00000415436	9606.ENSP00000351446	0	0	0	0	0.054	0.356	0.9	0.193	0.944
ESR2	FOS	1852756	1848822	9606.ENSP00000343925	9606.ENSP00000306245	0	0	0	0	0	0.173	0.8	0.69	0.944
UGT2B15	CYP3A4	1852407	1852052	9606.ENSP00000341045	9606.ENSP00000337915	0.055	0	0	0	0.055	0	0.9	0.456	0.944
HSD17B1	CYP1A1	1863967	1857086	9606.ENSP00000466799	9606.ENSP00000369050	0	0	0	0	0.054	0.096	0.9	0.415	0.943
CYP17A1	CYP19A1	1855129	1844790	9606.ENSP00000358903	9606.ENSP00000260433	0	0	0.526	0.63	0.042	0	0.9	0.843	0.943
MED1	SULT2A1	1848202	1842878	9606.ENSP00000300651	9606.ENSP00000222002	0	0	0	0	0	0	0.9	0.458	0.943
KAT8	OGT	1860574	1855977	9606.ENSP00000406037	9606.ENSP00000362824	0	0	0	0	0.053	0.379	0.9	0.13	0.942
CYP1A1	CYP3A4	1857086	1852052	9606.ENSP00000369050	9606.ENSP00000337915	0	0	0.526	0.652	0	0	0.9	0.885	0.942
HSD17B6	SULT1E1	1850063	1843091	9606.ENSP00000318631	9606.ENSP00000226444	0	0	0	0	0.053	0	0.9	0.442	0.942
GSTP1	CYP3A4	1858630	1852052	9606.ENSP00000381607	9606.ENSP00000337915	0	0	0	0	0	0.054	0.9	0.444	0.942
HSD3B2	CYP3A5	1855019	1842950	9606.ENSP00000358424	9606.ENSP00000222982	0.063	0	0	0	0.053	0.152	0.924	0.133	0.941
KAT8	MCRS1	1860574	1853470	9606.ENSP00000406037	9606.ENSP00000349640	0	0	0	0	0.063	0.359	0.9	0.144	0.941
GSTM1	CYP3A5	1849425	1842950	9606.ENSP00000311469	9606.ENSP00000222982	0	0	0	0	0	0	0.9	0.44	0.941
IGF1	AKT1	1848439	1846136	9606.ENSP00000302665	9606.ENSP00000270202	0	0	0	0	0	0	0	0.941	0.941
CYP17A1	CYP11B1	1855129	1847352	9606.ENSP00000358903	9606.ENSP00000292427	0	0	0	0.623	0.221	0	0.9	0.744	0.941
AKR1C1	HSD3B2	1857297	1855019	9606.ENSP00000370254	9606.ENSP00000358424	0.052	0	0	0	0.096	0	0.924	0.209	0.941
HSD17B1	CYP1B1	1863967	1844805	9606.ENSP00000466799	9606.ENSP00000260630	0	0	0	0	0.054	0.096	0.9	0.399	0.941
HSD3B1	CYP3A5	1855017	1842950	9606.ENSP00000358421	9606.ENSP00000222982	0.063	0	0	0	0.053	0.152	0.924	0.131	0.941
CYP1A1	UGT2A3	1857086	1844068	9606.ENSP00000369050	9606.ENSP00000251566	0.055	0	0	0	0.054	0	0.9	0.421	0.941
MYC	NCOA3	1856789	1855597	9606.ENSP00000367207	9606.ENSP00000361066	0	0	0	0	0	0	0.9	0.443	0.941
AKR1C3	CYP17A1	1857244	1855129	9606.ENSP00000369927	9606.ENSP00000358903	0	0	0	0	0.055	0.042	0.9	0.42	0.94
GSTA1	CYP1B1	1851878	1844805	9606.ENSP00000335620	9606.ENSP00000260630	0	0	0	0	0	0.063	0.9	0.412	0.94
PHF20	KANSL1	1856030	1845137	9606.ENSP00000363124	9606.ENSP00000262419	0	0	0	0	0.134	0	0.9	0.37	0.94
ESR2	MAPK11	1852756	1851615	9606.ENSP00000343925	9606.ENSP00000333685	0	0	0	0	0	0.399	0.9	0.084	0.94
KAT8	PHF20	1860574	1856030	9606.ENSP00000406037	9606.ENSP00000363124	0	0	0	0	0	0.373	0.9	0.126	0.94
POLE4	KANSL3	1861462	1859962	9606.ENSP00000420176	9606.ENSP00000396749	0	0	0	0	0	0.939	0	0	0.939
KAT8	HCFC1	1860574	1849194	9606.ENSP00000406037	9606.ENSP00000309555	0	0	0	0	0.057	0.359	0.9	0.112	0.939
CYP3A4	GSTA1	1852052	1851878	9606.ENSP00000337915	9606.ENSP00000335620	0	0	0	0	0	0.054	0.9	0.414	0.939
COMT	UGT1A1	1854135	1848677	9606.ENSP00000354511	9606.ENSP00000304845	0	0	0	0	0	0.082	0.9	0.394	0.939
CYP1A1	UGT2B7	1857086	1848674	9606.ENSP00000369050	9606.ENSP00000304811	0.055	0	0	0	0.054	0	0.9	0.388	0.938
ESR2	ESR1	1852756	1842435	9606.ENSP00000343925	9606.ENSP00000206249	0	0	0	0.935	0.053	0.36	0.9	0.93	0.938
HSD17B6	UGT1A1	1850063	1848677	9606.ENSP00000318631	9606.ENSP00000304845	0	0	0	0	0.179	0	0.9	0.309	0.938
HSD17B3	CYP11B1	1856269	1847352	9606.ENSP00000364412	9606.ENSP00000292427	0	0	0	0	0.051	0.048	0.9	0.398	0.938
EPHX1	CYP3A5	1846231	1842950	9606.ENSP00000272167	9606.ENSP00000222982	0	0	0	0	0.055	0.105	0.9	0.36	0.938
COMT	UGT2B7	1854135	1848674	9606.ENSP00000354511	9606.ENSP00000304811	0	0	0	0	0	0.082	0.9	0.374	0.937
CYP1A1	CYP3A5	1857086	1842950	9606.ENSP00000369050	9606.ENSP00000222982	0	0	0.526	0.659	0	0	0.9	0.722	0.937
CYP3A4	CYP19A1	1852052	1844790	9606.ENSP00000337915	9606.ENSP00000260433	0	0	0.527	0.631	0	0	0.9	0.636	0.937
EPHX1	GSTM2	1846231	1843595	9606.ENSP00000272167	9606.ENSP00000241337	0	0	0	0	0.098	0	0.9	0.364	0.937
HSD17B3	HSD17B8	1856269	1856159	9606.ENSP00000364412	9606.ENSP00000363794	0	0	0.468	0	0.056	0.12	0.8	0.397	0.937
KANSL2	PHF20	1861156	1856030	9606.ENSP00000415436	9606.ENSP00000363124	0	0	0	0	0	0	0.9	0.404	0.937
UGT1A4	HSD17B6	1855898	1850063	9606.ENSP00000362508	9606.ENSP00000318631	0	0	0	0	0.244	0	0.9	0.234	0.937
UGT1A9	CYP3A5	1853090	1842950	9606.ENSP00000346768	9606.ENSP00000222982	0.055	0	0	0	0	0	0.9	0.388	0.937
CYP1A1	CYP19A1	1857086	1844790	9606.ENSP00000369050	9606.ENSP00000260433	0	0	0.526	0.623	0	0	0.9	0.576	0.936
SRC	MAPK11	1853652	1851615	9606.ENSP00000350941	9606.ENSP00000333685	0	0	0	0.655	0.053	0.292	0.9	0.416	0.936
HSD17B6	CYP3A5	1850063	1842950	9606.ENSP00000318631	9606.ENSP00000222982	0	0	0	0	0.066	0.095	0.9	0.341	0.936
GSTP1	CYP3A5	1858630	1842950	9606.ENSP00000381607	9606.ENSP00000222982	0	0	0	0	0	0.054	0.9	0.38	0.936
UGT1A3	CYP3A5	1861363	1842950	9606.ENSP00000418532	9606.ENSP00000222982	0.055	0	0	0	0.055	0	0.9	0.361	0.935
AKR1C3	CYP19A1	1857244	1844790	9606.ENSP00000369927	9606.ENSP00000260433	0	0	0	0	0.055	0.042	0.9	0.366	0.935
MYC	FOS	1856789	1848822	9606.ENSP00000367207	9606.ENSP00000306245	0	0	0	0	0.056	0.073	0	0.931	0.935
CYP1B1	GSTM3	1844805	1844453	9606.ENSP00000260630	9606.ENSP00000256594	0	0	0	0	0	0	0.9	0.38	0.935
HSD3B2	AKR1D1	1855019	1843626	9606.ENSP00000358424	9606.ENSP00000242375	0.052	0	0	0	0.096	0	0.924	0.129	0.935
CYP3A4	UGT2B17	1852052	1850242	9606.ENSP00000337915	9606.ENSP00000320401	0.055	0	0	0	0.055	0	0.9	0.358	0.935
UGT2B7	CYP1B1	1848674	1844805	9606.ENSP00000304811	9606.ENSP00000260630	0.055	0	0	0	0.045	0	0.9	0.358	0.934
COMT	UGT1A9	1854135	1853090	9606.ENSP00000354511	9606.ENSP00000346768	0	0	0	0	0	0.082	0.9	0.345	0.934
MED1	NR0B2	1848202	1844279	9606.ENSP00000300651	9606.ENSP00000254227	0	0	0	0	0.052	0.15	0.9	0.282	0.934
GSTP1	HPGDS	1858630	1847557	9606.ENSP00000381607	9606.ENSP00000295256	0	0	0.407	0.714	0	0	0.9	0.92	0.934
CYP19A1	SULT1E1	1844790	1843091	9606.ENSP00000260433	9606.ENSP00000226444	0	0	0	0	0	0	0.9	0.375	0.934
CYP1B1	HSD17B7	1844805	1844300	9606.ENSP00000260630	9606.ENSP00000254521	0	0	0	0	0.055	0.275	0.9	0.147	0.933
HSD3B1	UGT2B15	1855017	1852407	9606.ENSP00000358421	9606.ENSP00000341045	0.087	0	0	0	0.043	0	0.9	0.331	0.933
HSD3B1	UGT2B17	1855017	1850242	9606.ENSP00000358421	9606.ENSP00000320401	0.087	0	0	0	0.043	0	0.9	0.331	0.933
WDR5	MCRS1	1853715	1853470	9606.ENSP00000351446	9606.ENSP00000349640	0	0	0	0	0.118	0.164	0.9	0.19	0.932
CYP1A1	HSD17B7	1857086	1844300	9606.ENSP00000369050	9606.ENSP00000254521	0	0	0	0	0.055	0.275	0.9	0.126	0.932
UGT1A4	CYP3A5	1855898	1842950	9606.ENSP00000362508	9606.ENSP00000222982	0.055	0	0	0	0.054	0	0.9	0.333	0.932
CYP19A1	CYP3A5	1844790	1842950	9606.ENSP00000260433	9606.ENSP00000222982	0	0	0.527	0.636	0	0	0.9	0.491	0.932
UGT1A7	CYP1B1	1855901	1844805	9606.ENSP00000362525	9606.ENSP00000260630	0.055	0	0	0	0.045	0	0.9	0.33	0.931
COMT	UGT1A6	1854135	1848501	9606.ENSP00000354511	9606.ENSP00000303174	0	0	0	0	0	0.082	0.9	0.316	0.931
CYP19A1	ESR1	1844790	1842435	9606.ENSP00000260433	9606.ENSP00000206249	0	0	0	0	0.049	0.079	0	0.928	0.931
ESR2	SMARCE1	1852756	1850602	9606.ENSP00000343925	9606.ENSP00000323967	0	0	0	0	0	0.344	0.9	0	0.931
UGT2B15	CYP19A1	1852407	1844790	9606.ENSP00000341045	9606.ENSP00000260433	0.055	0	0	0	0	0	0.9	0.333	0.931
UGT2B15	SRD5A1	1852407	1846366	9606.ENSP00000341045	9606.ENSP00000274192	0	0	0	0	0.053	0	0.9	0.33	0.931
GSTM1	GSTM3	1849425	1844453	9606.ENSP00000311469	9606.ENSP00000256594	0	0	0.526	0.979	0	0.324	0.9	0.759	0.931
UGT1A1	CYP19A1	1848677	1844790	9606.ENSP00000304845	9606.ENSP00000260433	0.055	0	0	0	0	0	0.9	0.328	0.93
GSTA1	GSTM1	1851878	1849425	9606.ENSP00000335620	9606.ENSP00000311469	0	0	0.223	0.67	0	0	0.9	0.781	0.93
HSD17B7	CYP3A5	1844300	1842950	9606.ENSP00000254521	9606.ENSP00000222982	0	0	0	0	0.055	0.275	0.9	0.107	0.93
CYP17A1	CYP3A4	1855129	1852052	9606.ENSP00000358903	9606.ENSP00000337915	0	0	0.527	0.672	0.054	0	0.9	0.481	0.93
SRC	ESR2	1853652	1852756	9606.ENSP00000350941	9606.ENSP00000343925	0	0	0	0	0	0.424	0.8	0.447	0.93
UGT1A3	HSD17B6	1861363	1850063	9606.ENSP00000418532	9606.ENSP00000318631	0	0	0	0	0.135	0	0.9	0.249	0.929
UGT2A3	CYP3A5	1844068	1842950	9606.ENSP00000251566	9606.ENSP00000222982	0.055	0	0	0	0.089	0	0.9	0.276	0.929
CYP3A4	HSD17B7	1852052	1844300	9606.ENSP00000337915	9606.ENSP00000254521	0	0	0	0	0.055	0.275	0.9	0.089	0.929
GSTA1	HPGDS	1851878	1847557	9606.ENSP00000335620	9606.ENSP00000295256	0	0	0.475	0.733	0	0	0.9	0.74	0.929
CYP3A4	SULT1E1	1852052	1843091	9606.ENSP00000337915	9606.ENSP00000226444	0	0	0	0	0.178	0	0.9	0.21	0.929
UBA3	ESR2	1854105	1852756	9606.ENSP00000354340	9606.ENSP00000343925	0	0	0	0	0	0.116	0.9	0.269	0.929
AKR1C3	UGT2B15	1857244	1852407	9606.ENSP00000369927	9606.ENSP00000341045	0	0	0	0	0.053	0	0.9	0.315	0.929
GSTA1	EPHX1	1851878	1846231	9606.ENSP00000335620	9606.ENSP00000272167	0	0	0	0	0.053	0	0.9	0.315	0.929
NCOA1	PRL	1850298	1848376	9606.ENSP00000320940	9606.ENSP00000302150	0	0	0	0	0	0	0.9	0.324	0.929
UGT2B17	SRD5A1	1850242	1846366	9606.ENSP00000320401	9606.ENSP00000274192	0	0	0	0	0.053	0	0.9	0.304	0.928
HSD3B2	UGT2B15	1855019	1852407	9606.ENSP00000358424	9606.ENSP00000341045	0.087	0	0	0	0.043	0	0.9	0.273	0.928
UGT1A10	CYP1B1	1852746	1844805	9606.ENSP00000343838	9606.ENSP00000260630	0.055	0	0	0	0.045	0	0.9	0.296	0.928
MAPK11	FOS	1851615	1848822	9606.ENSP00000333685	9606.ENSP00000306245	0	0	0	0	0	0.318	0.8	0.515	0.928
UGT1A3	CYP1B1	1861363	1844805	9606.ENSP00000418532	9606.ENSP00000260630	0.055	0	0	0	0.045	0	0.9	0.298	0.928
HSD17B8	CYP19A1	1856159	1844790	9606.ENSP00000363794	9606.ENSP00000260433	0	0	0	0	0.054	0.07	0.9	0.283	0.928
CYP1B1	GSTM2	1844805	1843595	9606.ENSP00000260630	9606.ENSP00000241337	0	0	0	0	0	0	0.9	0.304	0.927
HSD17B3	UGT2B15	1856269	1852407	9606.ENSP00000364412	9606.ENSP00000341045	0.075	0	0	0	0.048	0	0.9	0.275	0.927
GNAS	ESR1	1855402	1842435	9606.ENSP00000360141	9606.ENSP00000206249	0	0	0	0	0.042	0	0.9	0.304	0.927
AKR1C1	UGT2B15	1857297	1852407	9606.ENSP00000370254	9606.ENSP00000341045	0	0	0	0	0.053	0	0.9	0.285	0.926
GSTP1	GSTA1	1858630	1851878	9606.ENSP00000381607	9606.ENSP00000335620	0	0	0.419	0.767	0.053	0	0.9	0.788	0.926
UGT1A4	AKR1D1	1855898	1843626	9606.ENSP00000362508	9606.ENSP00000242375	0	0	0	0	0.228	0	0.9	0.128	0.926
HPGDS	CYP3A5	1847557	1842950	9606.ENSP00000295256	9606.ENSP00000222982	0	0	0	0	0	0.054	0.9	0.289	0.926
UGT2B17	CYP3A5	1850242	1842950	9606.ENSP00000320401	9606.ENSP00000222982	0.055	0	0	0	0.055	0	0.9	0.275	0.926
GSTM1	HPGDS	1849425	1847557	9606.ENSP00000311469	9606.ENSP00000295256	0	0	0.232	0.737	0	0	0.9	0.878	0.926
CYP3A4	UGT2A3	1852052	1844068	9606.ENSP00000337915	9606.ENSP00000251566	0.055	0	0	0	0.055	0	0.9	0.277	0.926
HSD17B1	CYP3A4	1863967	1852052	9606.ENSP00000466799	9606.ENSP00000337915	0	0	0	0	0.054	0.07	0.9	0.259	0.926
AKR1C3	UGT2B17	1857244	1850242	9606.ENSP00000369927	9606.ENSP00000320401	0	0	0	0	0.053	0	0.9	0.283	0.926
GSTA1	CYP3A5	1851878	1842950	9606.ENSP00000335620	9606.ENSP00000222982	0	0	0	0	0	0.054	0.9	0.28	0.925
PHF20	WDR5	1856030	1853715	9606.ENSP00000363124	9606.ENSP00000351446	0	0	0	0	0	0.19	0.9	0.15	0.925
MYC	NR0B2	1856789	1844279	9606.ENSP00000367207	9606.ENSP00000254227	0	0	0	0	0	0	0.9	0.29	0.925
UGT1A6	CYP19A1	1848501	1844790	9606.ENSP00000303174	9606.ENSP00000260433	0.055	0	0	0	0	0	0.9	0.275	0.925
UGT1A9	CYP1B1	1853090	1844805	9606.ENSP00000346768	9606.ENSP00000260630	0.055	0	0	0	0	0	0.9	0.276	0.925
HSD17B1	HSD17B3	1863967	1856269	9606.ENSP00000466799	9606.ENSP00000364412	0	0	0.364	0	0.056	0.12	0	0.875	0.925
UGT1A4	CYP1B1	1855898	1844805	9606.ENSP00000362508	9606.ENSP00000260630	0.055	0	0	0	0.045	0	0.9	0.276	0.925
HSD17B6	UGT2B7	1850063	1848674	9606.ENSP00000318631	9606.ENSP00000304811	0	0	0	0	0	0	0.9	0.282	0.925
UGT2B17	HSD17B6	1850242	1850063	9606.ENSP00000320401	9606.ENSP00000318631	0	0	0	0	0	0	0.9	0.277	0.924
MYC	MAPK11	1856789	1851615	9606.ENSP00000367207	9606.ENSP00000333685	0	0	0	0	0	0	0.9	0.278	0.924
UGT2A1	CYP3A4	1859306	1852052	9606.ENSP00000387888	9606.ENSP00000337915	0.055	0	0	0	0.055	0	0.9	0.257	0.924
AKR1C3	CYP1B1	1857244	1844805	9606.ENSP00000369927	9606.ENSP00000260630	0	0	0	0	0.055	0.042	0.9	0.267	0.924
SULT1E1	HSD17B2	1843091	1842388	9606.ENSP00000226444	9606.ENSP00000199936	0	0	0	0	0.045	0	0.9	0.272	0.924
UGT2B17	CYP19A1	1850242	1844790	9606.ENSP00000320401	9606.ENSP00000260433	0.055	0	0	0	0	0	0.9	0.261	0.924
AKR1C1	CYP1A1	1857297	1857086	9606.ENSP00000370254	9606.ENSP00000369050	0	0	0	0	0.055	0.042	0.9	0.268	0.924
PELP1	AKT1	1848285	1846136	9606.ENSP00000301396	9606.ENSP00000270202	0	0	0	0	0	0	0.9	0.277	0.924
CYP17A1	CYP3A5	1855129	1842950	9606.ENSP00000358903	9606.ENSP00000222982	0	0	0.527	0.665	0.054	0	0.9	0.274	0.924
GSTA1	GSTM3	1851878	1844453	9606.ENSP00000335620	9606.ENSP00000256594	0	0	0.306	0.686	0	0	0.9	0.574	0.924
ESR2	NEDD8	1852756	1844012	9606.ENSP00000343925	9606.ENSP00000250495	0	0	0	0	0	0.098	0.9	0.215	0.923
COMT	UGT2B15	1854135	1852407	9606.ENSP00000354511	9606.ENSP00000341045	0	0	0	0	0	0.082	0.9	0.235	0.923
AKR1C1	UGT2B17	1857297	1850242	9606.ENSP00000370254	9606.ENSP00000320401	0	0	0	0	0.053	0	0.9	0.258	0.923
UGT1A1	SULT1E1	1848677	1843091	9606.ENSP00000304845	9606.ENSP00000226444	0	0	0	0	0.055	0	0.9	0.256	0.923
CYP1A1	SULT2A1	1857086	1842878	9606.ENSP00000369050	9606.ENSP00000222002	0	0	0	0	0	0	0.9	0.264	0.923
HSD17B8	CYP17A1	1856159	1855129	9606.ENSP00000363794	9606.ENSP00000358903	0	0	0	0	0.054	0.07	0.9	0.23	0.923
KANSL2	KAT8	1861156	1860574	9606.ENSP00000415436	9606.ENSP00000406037	0	0	0	0	0.054	0.071	0.9	0.232	0.923
HPGDS	GSTM3	1847557	1844453	9606.ENSP00000295256	9606.ENSP00000256594	0	0	0.341	0.738	0	0	0.9	0.659	0.923
NCOA1	TFF1	1850298	1847287	9606.ENSP00000320940	9606.ENSP00000291527	0	0	0	0	0	0	0.9	0.271	0.923
CYP1B1	HSD17B2	1844805	1842388	9606.ENSP00000260630	9606.ENSP00000199936	0	0	0	0	0.051	0.095	0.9	0.218	0.923
HSD17B6	UGT1A6	1850063	1848501	9606.ENSP00000318631	9606.ENSP00000303174	0	0	0	0	0.051	0	0.9	0.256	0.923
UGT2B15	HSD17B6	1852407	1850063	9606.ENSP00000341045	9606.ENSP00000318631	0	0	0	0	0	0	0.9	0.262	0.923
UBA3	ESR1	1854105	1842435	9606.ENSP00000354340	9606.ENSP00000206249	0	0	0	0	0	0.116	0.9	0.194	0.922
UGT1A3	COMT	1861363	1854135	9606.ENSP00000418532	9606.ENSP00000354511	0	0	0	0	0	0.082	0.9	0.225	0.922
UGT1A7	CYP3A5	1855901	1842950	9606.ENSP00000362525	9606.ENSP00000222982	0.055	0	0	0	0.055	0	0.9	0.236	0.922
UGT2B15	HSD17B2	1852407	1842388	9606.ENSP00000341045	9606.ENSP00000199936	0	0	0	0	0.054	0	0.9	0.25	0.922
UGT1A7	COMT	1855901	1854135	9606.ENSP00000362525	9606.ENSP00000354511	0	0	0	0	0	0.082	0.9	0.226	0.922
CYP3A4	GSTM2	1852052	1843595	9606.ENSP00000337915	9606.ENSP00000241337	0	0	0	0	0	0	0.9	0.256	0.922
COMT	UGT1A10	1854135	1852746	9606.ENSP00000354511	9606.ENSP00000343838	0	0	0	0	0	0.082	0.9	0.226	0.922
UGT2B15	CYP1B1	1852407	1844805	9606.ENSP00000341045	9606.ENSP00000260630	0.055	0	0	0	0.045	0	0.9	0.246	0.922
CYP1A1	CYP1B1	1857086	1844805	9606.ENSP00000369050	9606.ENSP00000260630	0	0	0	0.903	0.181	0	0.9	0.93	0.922
AKR1C3	HPGDS	1857244	1847557	9606.ENSP00000369927	9606.ENSP00000295256	0	0	0	0	0.046	0	0.9	0.242	0.921
CYP1A1	HSD17B2	1857086	1842388	9606.ENSP00000369050	9606.ENSP00000199936	0	0	0	0	0.053	0.095	0.9	0.188	0.921
C3	ESR1	1843781	1842435	9606.ENSP00000245907	9606.ENSP00000206249	0	0	0	0	0.048	0	0.9	0.239	0.921
GSTP1	GSTM1	1858630	1849425	9606.ENSP00000381607	9606.ENSP00000311469	0	0	0.217	0.801	0	0	0.9	0.924	0.921
CYP3A4	CYP3A5	1852052	1842950	9606.ENSP00000337915	9606.ENSP00000222982	0	0	0.527	0.986	0.228	0	0.9	0.938	0.921
CYP1A1	UGT2B15	1857086	1852407	9606.ENSP00000369050	9606.ENSP00000341045	0.055	0	0	0	0.054	0	0.9	0.23	0.921
UGT2B7	CYP19A1	1848674	1844790	9606.ENSP00000304811	9606.ENSP00000260433	0.055	0	0	0	0	0	0.9	0.233	0.921
HSD17B3	UGT2B17	1856269	1850242	9606.ENSP00000364412	9606.ENSP00000320401	0.075	0	0	0	0.048	0	0.9	0.213	0.921
CYP1A1	UGT2B17	1857086	1850242	9606.ENSP00000369050	9606.ENSP00000320401	0.055	0	0	0	0.054	0	0.9	0.229	0.921
UGT1A10	CYP3A5	1852746	1842950	9606.ENSP00000343838	9606.ENSP00000222982	0.055	0	0	0	0.055	0	0.9	0.216	0.92
CYP11B1	CYP19A1	1847352	1844790	9606.ENSP00000292427	9606.ENSP00000260433	0	0	0	0.62	0.053	0	0.9	0.52	0.92
AKT1	CCND1	1846136	1843117	9606.ENSP00000270202	9606.ENSP00000227507	0	0	0	0	0.053	0	0	0.919	0.92
UGT2A1	CYP1A1	1859306	1857086	9606.ENSP00000387888	9606.ENSP00000369050	0.055	0	0	0	0.054	0	0.9	0.218	0.92
CYP1A1	SULT1E1	1857086	1843091	9606.ENSP00000369050	9606.ENSP00000226444	0	0	0	0	0	0	0.9	0.238	0.92
KANSL3	MCRS1	1859962	1853470	9606.ENSP00000396749	9606.ENSP00000349640	0	0	0	0	0.073	0	0.9	0.212	0.92
HSD17B8	HSD3B1	1856159	1855017	9606.ENSP00000363794	9606.ENSP00000358421	0.065	0	0	0	0.073	0.049	0.9	0.181	0.92
NEDD8	ESR1	1844012	1842435	9606.ENSP00000250495	9606.ENSP00000206249	0	0	0	0	0	0.098	0.9	0.186	0.92
KANSL3	WDR5	1859962	1853715	9606.ENSP00000396749	9606.ENSP00000351446	0	0	0	0	0.054	0.137	0.9	0.13	0.919
HSD3B2	UGT2B17	1855019	1850242	9606.ENSP00000358424	9606.ENSP00000320401	0.087	0	0	0	0.043	0	0.9	0.188	0.919
HSD17B1	CYP3A5	1863967	1842950	9606.ENSP00000466799	9606.ENSP00000222982	0	0	0	0	0.054	0.07	0.9	0.193	0.919
GSTA1	GSTM2	1851878	1843595	9606.ENSP00000335620	9606.ENSP00000241337	0	0	0	0.683	0	0	0.9	0.631	0.919
CYP11B1	HSD17B2	1847352	1842388	9606.ENSP00000292427	9606.ENSP00000199936	0	0	0	0	0	0.095	0.9	0.187	0.919
UGT2B7	AKR1D1	1848674	1843626	9606.ENSP00000304811	9606.ENSP00000242375	0	0	0	0	0.099	0	0.9	0.174	0.919
CYP3A4	HSD17B2	1852052	1842388	9606.ENSP00000337915	9606.ENSP00000199936	0	0	0	0	0.053	0.095	0.9	0.172	0.919
POLE4	TADA3	1861462	1848982	9606.ENSP00000420176	9606.ENSP00000307684	0	0	0	0	0	0.541	0.72	0.423	0.919
HSD17B1	UGT2B17	1863967	1850242	9606.ENSP00000466799	9606.ENSP00000320401	0	0	0	0	0	0.072	0.9	0.198	0.919
UGT2B15	SULT1E1	1852407	1843091	9606.ENSP00000341045	9606.ENSP00000226444	0	0	0	0	0.055	0	0.9	0.201	0.918
COMT	UGT2B17	1854135	1850242	9606.ENSP00000354511	9606.ENSP00000320401	0	0	0	0	0	0.082	0.9	0.181	0.918
UGT2B17	CYP1B1	1850242	1844805	9606.ENSP00000320401	9606.ENSP00000260630	0.055	0	0	0	0.045	0	0.9	0.207	0.918
UGT1A9	HSD17B6	1853090	1850063	9606.ENSP00000346768	9606.ENSP00000318631	0	0	0	0	0.051	0	0.9	0.214	0.918
HSD3B1	UGT2B7	1855017	1848674	9606.ENSP00000358421	9606.ENSP00000304811	0.087	0	0	0	0.043	0	0.9	0.177	0.918
UGT2B7	SULT1E1	1848674	1843091	9606.ENSP00000304811	9606.ENSP00000226444	0	0	0	0	0.055	0	0.9	0.206	0.918
HPGDS	GSTM2	1847557	1843595	9606.ENSP00000295256	9606.ENSP00000241337	0	0	0	0.731	0	0	0.9	0.7	0.918
HSD17B1	UGT2B15	1863967	1852407	9606.ENSP00000466799	9606.ENSP00000341045	0	0	0	0	0	0.072	0.9	0.195	0.918
CYP1A1	CYP17A1	1857086	1855129	9606.ENSP00000369050	9606.ENSP00000358903	0	0	0.527	0.823	0	0	0.9	0.628	0.918
AKR1C3	CYP1A1	1857244	1857086	9606.ENSP00000369927	9606.ENSP00000369050	0	0	0	0	0.055	0.042	0.9	0.202	0.918
WDR5	PELP1	1853715	1848285	9606.ENSP00000351446	9606.ENSP00000301396	0	0	0	0	0.1	0.164	0.9	0	0.918
UGT1A10	HSD17B6	1852746	1850063	9606.ENSP00000343838	9606.ENSP00000318631	0	0	0	0	0	0	0.9	0.215	0.918
UGT2A1	AKR1D1	1859306	1843626	9606.ENSP00000387888	9606.ENSP00000242375	0	0	0	0	0.083	0	0.9	0.175	0.917
ESR2	MAPK1	1852756	1842512	9606.ENSP00000343925	9606.ENSP00000215832	0	0	0	0	0	0.399	0.8	0.364	0.917
EPHX1	DHDH	1846231	1842829	9606.ENSP00000272167	9606.ENSP00000221403	0	0	0	0	0.054	0	0.9	0.202	0.917
PHF20	MCRS1	1856030	1853470	9606.ENSP00000363124	9606.ENSP00000349640	0	0	0	0	0	0	0.9	0.204	0.917
OGT	KANSL1	1855977	1845137	9606.ENSP00000362824	9606.ENSP00000262419	0	0	0	0	0.117	0.137	0.9	0	0.917
PELP1	IGF1R	1848285	1845984	9606.ENSP00000301396	9606.ENSP00000268035	0	0	0	0	0	0.065	0.9	0.186	0.917
UGT1A3	CYP19A1	1861363	1844790	9606.ENSP00000418532	9606.ENSP00000260433	0.055	0	0	0	0	0	0.9	0.192	0.917
HSD17B1	SULT1E1	1863967	1843091	9606.ENSP00000466799	9606.ENSP00000226444	0	0	0	0	0	0	0.9	0.209	0.917
UGT1A7	HSD17B6	1855901	1850063	9606.ENSP00000362525	9606.ENSP00000318631	0	0	0	0	0	0	0.9	0.21	0.917
AKR1C1	CYP17A1	1857297	1855129	9606.ENSP00000370254	9606.ENSP00000358903	0	0	0	0	0.055	0.042	0.9	0.195	0.917
HSD3B1	UGT1A6	1855017	1848501	9606.ENSP00000358421	9606.ENSP00000303174	0.087	0	0	0	0	0	0.9	0.164	0.917
CYP1B1	SULT2A1	1844805	1842878	9606.ENSP00000260630	9606.ENSP00000222002	0	0	0	0	0	0	0.9	0.204	0.916
KANSL3	OGT	1859962	1855977	9606.ENSP00000396749	9606.ENSP00000362824	0	0	0	0	0.11	0.137	0.9	0	0.916
HSD17B8	HSD3B2	1856159	1855019	9606.ENSP00000363794	9606.ENSP00000358424	0.065	0	0	0	0.073	0.049	0.9	0.148	0.916
UGT1A1	AKR1D1	1848677	1843626	9606.ENSP00000304845	9606.ENSP00000242375	0	0	0	0	0.118	0	0.9	0.128	0.916
HSD17B8	AKR1D1	1856159	1843626	9606.ENSP00000363794	9606.ENSP00000242375	0.086	0	0	0	0.059	0	0.9	0.148	0.916
UGT1A4	COMT	1855898	1854135	9606.ENSP00000362508	9606.ENSP00000354511	0	0	0	0	0	0.082	0.9	0.163	0.916
UGT1A3	SULT1E1	1861363	1843091	9606.ENSP00000418532	9606.ENSP00000226444	0	0	0	0	0.084	0	0.9	0.157	0.916
HSD3B1	UGT1A1	1855017	1848677	9606.ENSP00000358421	9606.ENSP00000304845	0.087	0	0	0	0	0	0.9	0.156	0.916
UGT1A6	SULT1E1	1848501	1843091	9606.ENSP00000303174	9606.ENSP00000226444	0	0	0	0	0.051	0	0.9	0.194	0.916
CYP3A4	GSTM3	1852052	1844453	9606.ENSP00000337915	9606.ENSP00000256594	0	0	0	0	0	0	0.9	0.199	0.916
MAPK11	ESR1	1851615	1842435	9606.ENSP00000333685	9606.ENSP00000206249	0	0	0	0	0	0.1	0.9	0.148	0.916
HSD17B8	CYP1B1	1856159	1844805	9606.ENSP00000363794	9606.ENSP00000260630	0	0	0	0	0.054	0.07	0.9	0.148	0.915
JUN	SMARCE1	1855436	1850602	9606.ENSP00000360266	9606.ENSP00000323967	0	0	0	0	0	0.136	0.9	0.097	0.915
HSD17B8	CYP3A5	1856159	1842950	9606.ENSP00000363794	9606.ENSP00000222982	0	0	0	0	0.054	0.07	0.9	0.148	0.915
HSD17B8	CYP3A4	1856159	1852052	9606.ENSP00000363794	9606.ENSP00000337915	0	0	0	0	0.054	0.07	0.9	0.148	0.915
UGT1A3	AKR1D1	1861363	1843626	9606.ENSP00000418532	9606.ENSP00000242375	0	0	0	0	0.099	0	0.9	0.134	0.915
HSD17B8	CYP11B1	1856159	1847352	9606.ENSP00000363794	9606.ENSP00000292427	0	0	0	0	0.054	0.07	0.9	0.148	0.915
OGT	MCRS1	1855977	1853470	9606.ENSP00000362824	9606.ENSP00000349640	0	0	0	0	0.055	0.159	0.9	0.067	0.915
JUN	WDR5	1855436	1853715	9606.ENSP00000360266	9606.ENSP00000351446	0	0	0	0	0	0.067	0.9	0.17	0.915
ESR2	UBE2M	1852756	1844187	9606.ENSP00000343925	9606.ENSP00000253023	0	0	0	0	0	0	0.9	0.19	0.915
NRIP1	AKT1	1850902	1846136	9606.ENSP00000327213	9606.ENSP00000270202	0	0	0	0	0	0	0.9	0.194	0.915
CYP1A1	NCOA1	1857086	1850298	9606.ENSP00000369050	9606.ENSP00000320940	0	0	0	0	0	0	0.9	0.189	0.915
CYP1A1	HSD17B8	1857086	1856159	9606.ENSP00000369050	9606.ENSP00000363794	0	0	0	0	0.054	0.07	0.9	0.148	0.915
UGT1A10	CYP19A1	1852746	1844790	9606.ENSP00000343838	9606.ENSP00000260433	0.055	0	0	0	0	0	0.9	0.171	0.914
UGT2A1	CYP1B1	1859306	1844805	9606.ENSP00000387888	9606.ENSP00000260630	0.055	0	0	0	0.045	0	0.9	0.164	0.914
AKR1C3	UGT2B7	1857244	1848674	9606.ENSP00000369927	9606.ENSP00000304811	0	0	0	0	0.053	0	0.9	0.171	0.914
AKR1C1	EPHX1	1857297	1846231	9606.ENSP00000370254	9606.ENSP00000272167	0	0	0	0	0.053	0	0.9	0.172	0.914
GSTP1	GSTM3	1858630	1844453	9606.ENSP00000381607	9606.ENSP00000256594	0	0	0.276	0.844	0	0	0.9	0.702	0.914
UGT1A4	CYP19A1	1855898	1844790	9606.ENSP00000362508	9606.ENSP00000260433	0.055	0	0	0	0	0	0.9	0.171	0.914
WDR5	NCOR1	1853715	1846039	9606.ENSP00000351446	9606.ENSP00000268712	0	0	0	0	0.057	0	0.9	0.169	0.914
UGT1A9	CYP19A1	1853090	1844790	9606.ENSP00000346768	9606.ENSP00000260433	0.055	0	0	0	0	0	0.9	0.169	0.914
HSD17B1	UGT1A6	1863967	1848501	9606.ENSP00000466799	9606.ENSP00000303174	0	0	0	0	0.076	0.072	0.9	0.119	0.914
UGT2B17	HSD17B2	1850242	1842388	9606.ENSP00000320401	9606.ENSP00000199936	0	0	0	0	0.054	0	0.9	0.171	0.914
AKR1C3	CYP3A4	1857244	1852052	9606.ENSP00000369927	9606.ENSP00000337915	0	0	0	0	0.055	0.048	0.9	0.159	0.914
UGT1A7	CYP19A1	1855901	1844790	9606.ENSP00000362525	9606.ENSP00000260433	0.055	0	0	0	0	0	0.9	0.163	0.913
NCOR2	MAPK1	1858893	1842512	9606.ENSP00000384018	9606.ENSP00000215832	0	0	0	0	0	0	0.9	0.172	0.913
HSD17B1	UGT1A1	1863967	1848677	9606.ENSP00000466799	9606.ENSP00000304845	0	0	0	0	0	0.072	0.9	0.147	0.913
CYP3A5	HSD17B2	1842950	1842388	9606.ENSP00000222982	9606.ENSP00000199936	0	0	0	0	0.053	0.095	0.9	0.106	0.913
UGT2A1	HSD17B6	1859306	1850063	9606.ENSP00000387888	9606.ENSP00000318631	0	0	0	0	0.072	0	0.9	0.141	0.913
UGT1A3	HSD3B1	1861363	1855017	9606.ENSP00000418532	9606.ENSP00000358421	0.087	0	0	0	0	0	0.9	0.127	0.913
UGT2A1	COMT	1859306	1854135	9606.ENSP00000387888	9606.ENSP00000354511	0	0	0	0	0	0.082	0.9	0.129	0.913
HSD17B1	UGT2B7	1863967	1848674	9606.ENSP00000466799	9606.ENSP00000304811	0	0	0	0	0	0.072	0.9	0.138	0.913
AKR1C1	UGT1A1	1857297	1848677	9606.ENSP00000370254	9606.ENSP00000304845	0	0	0	0	0.053	0	0.9	0.163	0.913
AKR1C3	CYP11B1	1857244	1847352	9606.ENSP00000369927	9606.ENSP00000292427	0	0	0	0	0.055	0.042	0.9	0.157	0.913
UGT1A9	SULT1E1	1853090	1843091	9606.ENSP00000346768	9606.ENSP00000226444	0	0	0	0	0.051	0	0.9	0.159	0.913
HSD3B2	UGT2A3	1855019	1844068	9606.ENSP00000358424	9606.ENSP00000251566	0.087	0	0	0	0	0	0.9	0.125	0.913
IGF1	PELP1	1848439	1848285	9606.ENSP00000302665	9606.ENSP00000301396	0	0	0	0	0	0	0.9	0.167	0.913
GSTM3	CYP3A5	1844453	1842950	9606.ENSP00000256594	9606.ENSP00000222982	0	0	0	0	0	0	0.9	0.172	0.913
UGT2B17	AKR1D1	1850242	1843626	9606.ENSP00000320401	9606.ENSP00000242375	0	0	0	0	0.053	0	0.9	0.162	0.913
GNAS	ESR2	1855402	1852756	9606.ENSP00000360141	9606.ENSP00000343925	0	0	0	0	0.042	0	0.9	0.17	0.913
UGT1A3	HSD3B2	1861363	1855019	9606.ENSP00000418532	9606.ENSP00000358424	0.087	0	0	0	0	0	0.9	0.117	0.912
ESR2	C3	1852756	1843781	9606.ENSP00000343925	9606.ENSP00000245907	0	0	0	0	0	0	0.9	0.16	0.912
KANSL3	PHF20	1859962	1856030	9606.ENSP00000396749	9606.ENSP00000363124	0	0	0	0	0.109	0	0.9	0.094	0.912
AKR1C1	UGT1A6	1857297	1848501	9606.ENSP00000370254	9606.ENSP00000303174	0	0	0	0	0	0	0.9	0.163	0.912
GSTP1	GSTM2	1858630	1843595	9606.ENSP00000381607	9606.ENSP00000241337	0	0	0	0.82	0	0	0.9	0.728	0.912
NCOA2	CYP1A1	1860191	1857086	9606.ENSP00000399968	9606.ENSP00000369050	0	0	0	0	0.053	0	0.9	0.146	0.912
UGT2B17	SULT1E1	1850242	1843091	9606.ENSP00000320401	9606.ENSP00000226444	0	0	0	0	0.055	0	0.9	0.151	0.912
UGT2A1	HSD3B2	1859306	1855019	9606.ENSP00000387888	9606.ENSP00000358424	0.087	0	0	0	0	0	0.9	0.116	0.912
HSD3B2	UGT2B7	1855019	1848674	9606.ENSP00000358424	9606.ENSP00000304811	0.087	0	0	0	0.043	0	0.9	0.116	0.912
HCFC1	KANSL1	1849194	1845137	9606.ENSP00000309555	9606.ENSP00000262419	0	0	0	0	0.093	0	0.9	0.112	0.912
JUN	UGT1A6	1855436	1848501	9606.ENSP00000360266	9606.ENSP00000303174	0	0	0	0	0	0	0.9	0.164	0.912
HSD3B1	UGT2A3	1855017	1844068	9606.ENSP00000358421	9606.ENSP00000251566	0.087	0	0	0	0	0	0.9	0.116	0.912
HSD3B1	UGT1A10	1855017	1852746	9606.ENSP00000358421	9606.ENSP00000343838	0.087	0	0	0	0	0	0.9	0.116	0.912
HSD3B2	UGT1A6	1855019	1848501	9606.ENSP00000358424	9606.ENSP00000303174	0.087	0	0	0	0	0	0.9	0.116	0.912
AKR1C1	CYP11B1	1857297	1847352	9606.ENSP00000370254	9606.ENSP00000292427	0	0	0	0	0.055	0.042	0.9	0.15	0.912
KAT8	KANSL3	1860574	1859962	9606.ENSP00000406037	9606.ENSP00000396749	0	0	0	0	0.053	0	0.9	0.148	0.912
HSD3B2	UGT1A9	1855019	1853090	9606.ENSP00000358424	9606.ENSP00000346768	0.087	0	0	0	0	0	0.9	0.113	0.911
AKR1C3	UGT1A1	1857244	1848677	9606.ENSP00000369927	9606.ENSP00000304845	0	0	0	0	0.053	0	0.9	0.138	0.911
HSD3B2	UGT1A10	1855019	1852746	9606.ENSP00000358424	9606.ENSP00000343838	0.087	0	0	0	0	0	0.9	0.113	0.911
AKR1C3	CYP3A5	1857244	1842950	9606.ENSP00000369927	9606.ENSP00000222982	0	0	0	0	0.055	0.048	0.9	0.136	0.911
UGT1A7	HSD3B2	1855901	1855019	9606.ENSP00000362525	9606.ENSP00000358424	0.087	0	0	0	0	0	0.9	0.113	0.911
AKR1C1	CYP3A4	1857297	1852052	9606.ENSP00000370254	9606.ENSP00000337915	0	0	0	0	0.055	0.048	0.9	0.136	0.911
CYP17A1	AKR1D1	1855129	1843626	9606.ENSP00000358903	9606.ENSP00000242375	0	0	0	0	0.055	0.042	0.9	0.134	0.911
HSD3B2	UGT1A1	1855019	1848677	9606.ENSP00000358424	9606.ENSP00000304845	0.087	0	0	0	0	0	0.9	0.113	0.911
HSD3B1	UGT1A9	1855017	1853090	9606.ENSP00000358421	9606.ENSP00000346768	0.087	0	0	0	0	0	0.9	0.113	0.911
UGT2A3	AKR1D1	1844068	1843626	9606.ENSP00000251566	9606.ENSP00000242375	0	0	0	0	0.055	0	0.9	0.141	0.911
UGT2B7	SRD5A1	1848674	1846366	9606.ENSP00000304811	9606.ENSP00000274192	0	0	0	0	0.053	0	0.9	0.14	0.911
UGT1A4	HSD3B2	1855898	1855019	9606.ENSP00000362508	9606.ENSP00000358424	0.087	0	0	0	0	0	0.9	0.113	0.911
ESR2	SMARCB1	1852756	1845291	9606.ENSP00000343925	9606.ENSP00000263121	0	0	0	0	0	0.051	0.9	0.141	0.911
CYP19A1	AKR1D1	1844790	1843626	9606.ENSP00000260433	9606.ENSP00000242375	0	0	0	0	0.055	0.042	0.9	0.136	0.911
AKR1C1	UGT2B7	1857297	1848674	9606.ENSP00000370254	9606.ENSP00000304811	0	0	0	0	0.053	0	0.9	0.138	0.911
UGT1A7	HSD3B1	1855901	1855017	9606.ENSP00000362525	9606.ENSP00000358421	0.087	0	0	0	0	0	0.9	0.113	0.911
UGT2A1	HSD3B1	1859306	1855017	9606.ENSP00000387888	9606.ENSP00000358421	0.087	0	0	0	0	0	0.9	0.113	0.911
UGT1A4	HSD3B1	1855898	1855017	9606.ENSP00000362508	9606.ENSP00000358421	0.087	0	0	0	0	0	0.9	0.113	0.911
UBE2M	ESR1	1844187	1842435	9606.ENSP00000253023	9606.ENSP00000206249	0	0	0	0	0	0	0.9	0.143	0.91
UGT1A3	AKR1C3	1861363	1857244	9606.ENSP00000418532	9606.ENSP00000369927	0	0	0	0	0.053	0	0.9	0.128	0.91
KANSL2	OGT	1861156	1855977	9606.ENSP00000415436	9606.ENSP00000362824	0	0	0	0	0	0.137	0.9	0	0.91
AKR1C1	UGT2A3	1857297	1844068	9606.ENSP00000370254	9606.ENSP00000251566	0	0	0	0	0.054	0	0.9	0.128	0.91
AKR1C1	UGT1A7	1857297	1855901	9606.ENSP00000370254	9606.ENSP00000362525	0	0	0	0	0.053	0	0.9	0.128	0.91
AKR1C3	UGT1A7	1857244	1855901	9606.ENSP00000369927	9606.ENSP00000362525	0	0	0	0	0.053	0	0.9	0.128	0.91
UGT1A6	AKR1D1	1848501	1843626	9606.ENSP00000303174	9606.ENSP00000242375	0	0	0	0	0.053	0	0.9	0.132	0.91
AKR1C1	UGT1A10	1857297	1852746	9606.ENSP00000370254	9606.ENSP00000343838	0	0	0	0	0.053	0	0.9	0.128	0.91
UGT1A9	AKR1D1	1853090	1843626	9606.ENSP00000346768	9606.ENSP00000242375	0	0	0	0	0.053	0	0.9	0.128	0.91
NRIP1	MAPK1	1850902	1842512	9606.ENSP00000327213	9606.ENSP00000215832	0	0	0	0	0	0	0.9	0.144	0.91
SULT1E1	CYP3A5	1843091	1842950	9606.ENSP00000226444	9606.ENSP00000222982	0	0	0	0	0.087	0	0.9	0.095	0.91
AKR1C3	UGT1A10	1857244	1852746	9606.ENSP00000369927	9606.ENSP00000343838	0	0	0	0	0.053	0	0.9	0.128	0.91
AKR1C3	UGT2A3	1857244	1844068	9606.ENSP00000369927	9606.ENSP00000251566	0	0	0	0	0.054	0	0.9	0.128	0.91
UGT2B15	AKR1D1	1852407	1843626	9606.ENSP00000341045	9606.ENSP00000242375	0	0	0	0	0.053	0	0.9	0.135	0.91
PHF20	OGT	1856030	1855977	9606.ENSP00000363124	9606.ENSP00000362824	0	0	0	0	0.091	0.094	0.9	0	0.91
UGT1A7	AKR1D1	1855901	1843626	9606.ENSP00000362525	9606.ENSP00000242375	0	0	0	0	0.053	0	0.9	0.128	0.91
UGT2A1	AKR1C3	1859306	1857244	9606.ENSP00000387888	9606.ENSP00000369927	0	0	0	0	0.053	0	0.9	0.128	0.91
UGT2A1	AKR1C1	1859306	1857297	9606.ENSP00000387888	9606.ENSP00000370254	0	0	0	0	0.053	0	0.9	0.128	0.91
UGT2A1	CYP3A5	1859306	1842950	9606.ENSP00000387888	9606.ENSP00000222982	0.055	0	0	0	0.055	0	0.9	0.116	0.91
UGT1A10	AKR1D1	1852746	1843626	9606.ENSP00000343838	9606.ENSP00000242375	0	0	0	0	0.053	0	0.9	0.128	0.91
UGT1A3	AKR1C1	1861363	1857297	9606.ENSP00000418532	9606.ENSP00000370254	0	0	0	0	0.053	0	0.9	0.128	0.91
AKR1C3	UGT1A9	1857244	1853090	9606.ENSP00000369927	9606.ENSP00000346768	0	0	0	0	0	0	0.9	0.128	0.909
UGT2A1	CYP19A1	1859306	1844790	9606.ENSP00000387888	9606.ENSP00000260433	0.055	0	0	0	0	0	0.9	0.116	0.909
MCRS1	HCFC1	1853470	1849194	9606.ENSP00000349640	9606.ENSP00000309555	0	0	0	0	0	0	0.9	0.136	0.909
AKR1C1	UGT1A9	1857297	1853090	9606.ENSP00000370254	9606.ENSP00000346768	0	0	0	0	0	0	0.9	0.128	0.909
AKR1C3	UGT1A4	1857244	1855898	9606.ENSP00000369927	9606.ENSP00000362508	0	0	0	0	0.05	0	0.9	0.128	0.909
NCOA2	TFF1	1860191	1847287	9606.ENSP00000399968	9606.ENSP00000291527	0	0	0	0	0	0	0.9	0.135	0.909
AKR1C3	UGT1A6	1857244	1848501	9606.ENSP00000369927	9606.ENSP00000303174	0	0	0	0	0	0	0.9	0.128	0.909
COMT	UGT2A3	1854135	1844068	9606.ENSP00000354511	9606.ENSP00000251566	0	0	0	0	0	0.082	0.9	0.093	0.909
CYP19A1	UGT2A3	1844790	1844068	9606.ENSP00000260433	9606.ENSP00000251566	0.055	0	0	0	0	0	0.9	0.116	0.909
HSD17B3	AKR1D1	1856269	1843626	9606.ENSP00000364412	9606.ENSP00000242375	0	0	0	0	0.046	0	0.9	0.123	0.909
CYP1B1	UGT2A3	1844805	1844068	9606.ENSP00000260630	9606.ENSP00000251566	0.055	0	0	0	0.045	0	0.9	0.116	0.909
AKR1C1	UGT1A4	1857297	1855898	9606.ENSP00000370254	9606.ENSP00000362508	0	0	0	0	0.05	0	0.9	0.128	0.909
IGF1	PRL	1848439	1848376	9606.ENSP00000302665	9606.ENSP00000302150	0	0	0	0	0	0	0	0.909	0.909
HSD17B1	UGT1A9	1863967	1853090	9606.ENSP00000466799	9606.ENSP00000346768	0	0	0	0	0.05	0.072	0.9	0.08	0.908
AKR1C3	SULT1E1	1857244	1843091	9606.ENSP00000369927	9606.ENSP00000226444	0	0	0	0	0.054	0	0.9	0.111	0.908
UGT1A10	SULT1E1	1852746	1843091	9606.ENSP00000343838	9606.ENSP00000226444	0	0	0	0	0.055	0	0.9	0.107	0.908
UGT2A1	SULT1E1	1859306	1843091	9606.ENSP00000387888	9606.ENSP00000226444	0	0	0	0	0.055	0	0.9	0.108	0.908
UGT2B7	HSD17B7	1848674	1844300	9606.ENSP00000304811	9606.ENSP00000254521	0	0	0	0	0	0	0.9	0.124	0.908
HSD17B8	UGT1A1	1856159	1848677	9606.ENSP00000363794	9606.ENSP00000304845	0	0	0	0	0	0.072	0.9	0.08	0.907
HSD17B1	UGT1A3	1863967	1861363	9606.ENSP00000466799	9606.ENSP00000418532	0	0	0	0	0	0.072	0.9	0.08	0.907
HSD17B8	UGT2A3	1856159	1844068	9606.ENSP00000363794	9606.ENSP00000251566	0	0	0	0	0	0.072	0.9	0.08	0.907
HSD17B1	UGT2A1	1863967	1859306	9606.ENSP00000466799	9606.ENSP00000387888	0	0	0	0	0	0.072	0.9	0.08	0.907
HSD17B1	UGT2A3	1863967	1844068	9606.ENSP00000466799	9606.ENSP00000251566	0	0	0	0	0	0.072	0.9	0.08	0.907
UGT1A7	SULT1E1	1855901	1843091	9606.ENSP00000362525	9606.ENSP00000226444	0	0	0	0	0.055	0	0.9	0.098	0.907
HSD17B8	UGT1A10	1856159	1852746	9606.ENSP00000363794	9606.ENSP00000343838	0	0	0	0	0	0.072	0.9	0.08	0.907
HSD17B8	UGT2B7	1856159	1848674	9606.ENSP00000363794	9606.ENSP00000304811	0	0	0	0	0	0.072	0.9	0.08	0.907
NCOA1	SULT2A1	1850298	1842878	9606.ENSP00000320940	9606.ENSP00000222002	0	0	0	0	0	0	0.9	0.114	0.907
HSD17B8	UGT1A6	1856159	1848501	9606.ENSP00000363794	9606.ENSP00000303174	0	0	0	0	0	0.072	0.9	0.08	0.907
JUN	AKT1	1855436	1846136	9606.ENSP00000360266	9606.ENSP00000270202	0	0	0	0	0.05	0	0	0.906	0.907
CCND1	MAPK1	1843117	1842512	9606.ENSP00000227507	9606.ENSP00000215832	0	0	0	0	0.053	0.349	0	0.86	0.907
HSD17B8	UGT2B15	1856159	1852407	9606.ENSP00000363794	9606.ENSP00000341045	0	0	0	0	0	0.072	0.9	0.08	0.907
FOS	UGT1A6	1848822	1848501	9606.ENSP00000306245	9606.ENSP00000303174	0	0	0	0	0	0	0.9	0.113	0.907
UGT2A1	HSD17B2	1859306	1842388	9606.ENSP00000387888	9606.ENSP00000199936	0	0	0	0	0.053	0	0.9	0.098	0.907
HSD17B1	UGT1A7	1863967	1855901	9606.ENSP00000466799	9606.ENSP00000362525	0	0	0	0	0	0.072	0.9	0.08	0.907
HSD17B8	UGT2B17	1856159	1850242	9606.ENSP00000363794	9606.ENSP00000320401	0	0	0	0	0	0.072	0.9	0.08	0.907
HSD3B2	HSD3B1	1855019	1855017	9606.ENSP00000358424	9606.ENSP00000358421	0	0	0.527	0.989	0.104	0	0.9	0.685	0.907
HSD17B8	UGT1A7	1856159	1855901	9606.ENSP00000363794	9606.ENSP00000362525	0	0	0	0	0	0.072	0.9	0.08	0.907
HSD17B8	UGT1A4	1856159	1855898	9606.ENSP00000363794	9606.ENSP00000362508	0	0	0	0	0	0.072	0.9	0.08	0.907
UGT1A3	HSD17B8	1861363	1856159	9606.ENSP00000418532	9606.ENSP00000363794	0	0	0	0	0	0.072	0.9	0.08	0.907
HSD17B1	UGT1A10	1863967	1852746	9606.ENSP00000466799	9606.ENSP00000343838	0	0	0	0	0	0.072	0.9	0.08	0.907
HSD17B1	UGT1A4	1863967	1855898	9606.ENSP00000466799	9606.ENSP00000362508	0	0	0	0	0	0.072	0.9	0.08	0.907
SMARCE1	CCND1	1850602	1843117	9606.ENSP00000323967	9606.ENSP00000227507	0	0	0	0	0	0	0.9	0.113	0.907
UGT2A1	HSD17B8	1859306	1856159	9606.ENSP00000387888	9606.ENSP00000363794	0	0	0	0	0	0.072	0.9	0.08	0.907
HSD17B8	UGT1A9	1856159	1853090	9606.ENSP00000363794	9606.ENSP00000346768	0	0	0	0	0	0.072	0.9	0.08	0.907
CYP1A1	MED1	1857086	1848202	9606.ENSP00000369050	9606.ENSP00000300651	0	0	0	0	0	0	0.9	0.1	0.906
HSD17B7	SULT1E1	1844300	1843091	9606.ENSP00000254521	9606.ENSP00000226444	0	0	0	0	0	0	0.9	0.099	0.906
AKR1D1	HSD17B2	1843626	1842388	9606.ENSP00000242375	9606.ENSP00000199936	0	0	0	0	0.055	0	0.9	0.091	0.906
HSD17B3	UGT1A6	1856269	1848501	9606.ENSP00000364412	9606.ENSP00000303174	0.075	0	0	0	0.048	0	0.9	0.065	0.906
CYP11B1	SRD5A1	1847352	1846366	9606.ENSP00000292427	9606.ENSP00000274192	0	0	0	0	0.052	0	0.9	0.095	0.906
UGT1A1	HSD17B2	1848677	1842388	9606.ENSP00000304845	9606.ENSP00000199936	0	0	0	0	0.053	0	0.9	0.089	0.906
UGT2B17	HSD17B7	1850242	1844300	9606.ENSP00000320401	9606.ENSP00000254521	0	0	0	0	0	0	0.9	0.101	0.906
HSD17B3	UGT1A9	1856269	1853090	9606.ENSP00000364412	9606.ENSP00000346768	0.075	0	0	0	0.048	0	0.9	0.065	0.906
PHF20	HCFC1	1856030	1849194	9606.ENSP00000363124	9606.ENSP00000309555	0	0	0	0	0	0	0.9	0.101	0.906
HSD17B8	SRD5A1	1856159	1846366	9606.ENSP00000363794	9606.ENSP00000274192	0	0	0	0	0.054	0	0.9	0.082	0.905
UGT2B15	HSD17B7	1852407	1844300	9606.ENSP00000341045	9606.ENSP00000254521	0	0	0	0	0	0	0.9	0.096	0.905
CYP11B1	AKR1D1	1847352	1843626	9606.ENSP00000292427	9606.ENSP00000242375	0	0	0	0	0.055	0.042	0.9	0.08	0.905
HSD17B3	UGT1A4	1856269	1855898	9606.ENSP00000364412	9606.ENSP00000362508	0.075	0	0	0	0.048	0	0.9	0	0.904
HSD17B3	UGT1A10	1856269	1852746	9606.ENSP00000364412	9606.ENSP00000343838	0.075	0	0	0	0.048	0	0.9	0	0.904
UGT1A3	HSD17B3	1861363	1856269	9606.ENSP00000418532	9606.ENSP00000364412	0.075	0	0	0	0.048	0	0.9	0	0.904
SRD5A1	UGT2A3	1846366	1844068	9606.ENSP00000274192	9606.ENSP00000251566	0	0	0	0	0.052	0	0.9	0.07	0.904
UGT2A1	HSD17B3	1859306	1856269	9606.ENSP00000387888	9606.ENSP00000364412	0.075	0	0	0	0.048	0	0.9	0	0.904
HSD17B3	UGT1A1	1856269	1848677	9606.ENSP00000364412	9606.ENSP00000304845	0.075	0	0	0	0.048	0	0.9	0	0.904
HSD17B3	UGT1A7	1856269	1855901	9606.ENSP00000364412	9606.ENSP00000362525	0.075	0	0	0	0.048	0	0.9	0	0.904
HSD17B3	UGT2B7	1856269	1848674	9606.ENSP00000364412	9606.ENSP00000304811	0.075	0	0	0	0.048	0	0.9	0	0.904
UGT1A6	SRD5A1	1848501	1846366	9606.ENSP00000303174	9606.ENSP00000274192	0	0	0	0	0.052	0	0.9	0.074	0.904
HSD17B3	UGT2A3	1856269	1844068	9606.ENSP00000364412	9606.ENSP00000251566	0.075	0	0	0	0.048	0	0.9	0	0.904
HCFC1	PELP1	1849194	1848285	9606.ENSP00000309555	9606.ENSP00000301396	0	0	0	0	0.088	0	0.9	0	0.904
KAT8	PELP1	1860574	1848285	9606.ENSP00000406037	9606.ENSP00000301396	0	0	0	0	0.049	0	0.9	0.065	0.903
GSTM2	CYP3A5	1843595	1842950	9606.ENSP00000241337	9606.ENSP00000222982	0	0	0	0	0	0	0.9	0.079	0.903
UGT1A4	SULT1E1	1855898	1843091	9606.ENSP00000362508	9606.ENSP00000226444	0	0	0	0	0.054	0	0.9	0.06	0.903
UGT2A3	SULT1E1	1844068	1843091	9606.ENSP00000251566	9606.ENSP00000226444	0	0	0	0	0.055	0	0.9	0.064	0.903
HSD17B7	UGT2A3	1844300	1844068	9606.ENSP00000254521	9606.ENSP00000251566	0	0	0	0	0	0	0.9	0.074	0.903
UGT1A1	SRD5A1	1848677	1846366	9606.ENSP00000304845	9606.ENSP00000274192	0	0	0	0	0.052	0	0.9	0.066	0.903
UGT1A6	HSD17B2	1848501	1842388	9606.ENSP00000303174	9606.ENSP00000199936	0	0	0	0	0.051	0	0.9	0.066	0.903
UGT2A1	SRD5A1	1859306	1846366	9606.ENSP00000387888	9606.ENSP00000274192	0	0	0	0	0.052	0	0.9	0.055	0.902
HSD17B8	SULT1E1	1856159	1843091	9606.ENSP00000363794	9606.ENSP00000226444	0	0	0	0	0	0	0.9	0.063	0.902
UGT1A3	HSD17B2	1861363	1842388	9606.ENSP00000418532	9606.ENSP00000199936	0	0	0	0	0.053	0	0.9	0.057	0.902
KANSL2	HCFC1	1861156	1849194	9606.ENSP00000415436	9606.ENSP00000309555	0	0	0	0	0	0	0.9	0.066	0.902
UGT2B7	HSD17B2	1848674	1842388	9606.ENSP00000304811	9606.ENSP00000199936	0	0	0	0	0.054	0	0.9	0.051	0.902
AKR1C3	HSD17B6	1857244	1850063	9606.ENSP00000369927	9606.ENSP00000318631	0	0	0	0	0	0	0.8	0.531	0.902
UGT2A3	HSD17B2	1844068	1842388	9606.ENSP00000251566	9606.ENSP00000199936	0	0	0	0	0.053	0	0.9	0.051	0.902
KANSL3	HCFC1	1859962	1849194	9606.ENSP00000396749	9606.ENSP00000309555	0	0	0	0	0	0	0.9	0.068	0.902
UGT1A4	SRD5A1	1855898	1846366	9606.ENSP00000362508	9606.ENSP00000274192	0	0	0	0	0.052	0	0.9	0	0.901
PHF20	AKT1	1856030	1846136	9606.ENSP00000363124	9606.ENSP00000270202	0	0	0	0	0	0	0.9	0.052	0.901
UGT1A9	HSD17B2	1853090	1842388	9606.ENSP00000346768	9606.ENSP00000199936	0	0	0	0	0.051	0	0.9	0	0.901
UGT1A10	HSD17B2	1852746	1842388	9606.ENSP00000343838	9606.ENSP00000199936	0	0	0	0	0.053	0	0.9	0	0.901
MCRS1	PELP1	1853470	1848285	9606.ENSP00000349640	9606.ENSP00000301396	0	0	0	0	0.053	0	0.9	0.043	0.901
NCOA2	SULT2A1	1860191	1842878	9606.ENSP00000399968	9606.ENSP00000222002	0	0	0	0	0	0	0.9	0.051	0.901
UGT1A7	HSD17B2	1855901	1842388	9606.ENSP00000362525	9606.ENSP00000199936	0	0	0	0	0.053	0	0.9	0	0.901
UGT1A9	MED1	1853090	1848202	9606.ENSP00000346768	9606.ENSP00000300651	0	0	0	0	0	0	0.9	0.051	0.901
HSD17B6	UGT2A3	1850063	1844068	9606.ENSP00000318631	9606.ENSP00000251566	0	0	0	0	0.053	0	0.9	0.048	0.901
UGT1A10	SRD5A1	1852746	1846366	9606.ENSP00000343838	9606.ENSP00000274192	0	0	0	0	0.052	0	0.9	0	0.901
UGT1A3	SRD5A1	1861363	1846366	9606.ENSP00000418532	9606.ENSP00000274192	0	0	0	0	0.052	0	0.9	0	0.901
UGT1A4	HSD17B2	1855898	1842388	9606.ENSP00000362508	9606.ENSP00000199936	0	0	0	0	0.053	0	0.9	0	0.901
UGT1A9	SRD5A1	1853090	1846366	9606.ENSP00000346768	9606.ENSP00000274192	0	0	0	0	0.052	0	0.9	0	0.901
UGT1A7	SRD5A1	1855901	1846366	9606.ENSP00000362525	9606.ENSP00000274192	0	0	0	0	0.052	0	0.9	0	0.901
UGT1A6	HSD17B7	1848501	1844300	9606.ENSP00000303174	9606.ENSP00000254521	0	0	0	0	0	0	0.9	0	0.9
UGT1A1	HSD17B7	1848677	1844300	9606.ENSP00000304845	9606.ENSP00000254521	0	0	0	0	0	0	0.9	0	0.9
UGT2A1	HSD17B7	1859306	1844300	9606.ENSP00000387888	9606.ENSP00000254521	0	0	0	0	0	0	0.9	0	0.9
POLE4	BRCA1	1861462	1861387	9606.ENSP00000420176	9606.ENSP00000418960	0	0	0	0	0	0	0.9	0	0.9
NCOA2	UGT1A9	1860191	1853090	9606.ENSP00000399968	9606.ENSP00000346768	0	0	0	0	0	0	0.9	0	0.9
UGT1A9	HSD17B7	1853090	1844300	9606.ENSP00000346768	9606.ENSP00000254521	0	0	0	0	0	0	0.9	0	0.9
PELP1	KANSL1	1848285	1845137	9606.ENSP00000301396	9606.ENSP00000262419	0	0	0	0	0.049	0	0.9	0	0.9
UGT1A10	HSD17B7	1852746	1844300	9606.ENSP00000343838	9606.ENSP00000254521	0	0	0	0	0	0	0.9	0	0.9
DDX54	C3	1850587	1843781	9606.ENSP00000323858	9606.ENSP00000245907	0	0	0	0	0	0	0.9	0	0.9
UGT1A4	HSD17B7	1855898	1844300	9606.ENSP00000362508	9606.ENSP00000254521	0	0	0	0	0	0	0.9	0	0.9
PHF20	PELP1	1856030	1848285	9606.ENSP00000363124	9606.ENSP00000301396	0	0	0	0	0	0	0.9	0	0.9
NCOA3	WDR5	1855597	1853715	9606.ENSP00000361066	9606.ENSP00000351446	0	0	0	0	0	0	0.9	0	0.9
UGT1A7	HSD17B7	1855901	1844300	9606.ENSP00000362525	9606.ENSP00000254521	0	0	0	0	0	0	0.9	0	0.9
DDX54	TFF1	1850587	1847287	9606.ENSP00000323858	9606.ENSP00000291527	0	0	0	0	0	0	0.9	0	0.9
UGT1A9	NCOA1	1853090	1850298	9606.ENSP00000346768	9606.ENSP00000320940	0	0	0	0	0	0	0.9	0	0.9
UGT1A3	HSD17B7	1861363	1844300	9606.ENSP00000418532	9606.ENSP00000254521	0	0	0	0	0	0	0.9	0	0.9
AKR1C3	HSD17B3	1857244	1856269	9606.ENSP00000369927	9606.ENSP00000364412	0	0	0	0	0.046	0	0.8	0.517	0.899
JUN	SRC	1855436	1853652	9606.ENSP00000360266	9606.ENSP00000350941	0	0	0	0	0.048	0.174	0	0.88	0.897
HSD17B6	HSD17B7	1850063	1844300	9606.ENSP00000318631	9606.ENSP00000254521	0	0	0	0	0	0	0.8	0.504	0.896
MAPK11	AKT1	1851615	1846136	9606.ENSP00000333685	9606.ENSP00000270202	0	0	0.232	0.646	0.084	0.292	0.8	0.62	0.896
HSD17B1	HSD17B8	1863967	1856159	9606.ENSP00000466799	9606.ENSP00000363794	0	0	0.243	0	0.053	0	0.8	0.321	0.889
JUN	ESR2	1855436	1852756	9606.ENSP00000360266	9606.ENSP00000343925	0	0	0	0	0	0.076	0.8	0.437	0.886
HSD17B1	AKR1C3	1863967	1857244	9606.ENSP00000466799	9606.ENSP00000369927	0.086	0	0	0	0.059	0	0.8	0.417	0.886
AKR1C3	DHDH	1857244	1842829	9606.ENSP00000369927	9606.ENSP00000221403	0.067	0	0	0	0.1	0	0	0.874	0.885
ESR2	NCOR1	1852756	1846039	9606.ENSP00000343925	9606.ENSP00000268712	0	0	0	0	0	0.699	0	0.626	0.882
MYC	SRC	1856789	1853652	9606.ENSP00000367207	9606.ENSP00000350941	0	0	0	0	0	0.065	0	0.877	0.881
SRC	FOS	1853652	1848822	9606.ENSP00000350941	9606.ENSP00000306245	0	0	0	0	0	0.09	0	0.873	0.879
AKR1C3	HSD17B2	1857244	1842388	9606.ENSP00000369927	9606.ENSP00000199936	0	0	0	0	0.049	0	0.8	0.392	0.874
HSD17B1	HSD17B6	1863967	1850063	9606.ENSP00000466799	9606.ENSP00000318631	0	0	0.511	0.659	0	0	0.8	0.703	0.872
OGT	AKT1	1855977	1846136	9606.ENSP00000362824	9606.ENSP00000270202	0	0	0	0	0.054	0	0.8	0.367	0.869
SRC	CCND1	1853652	1843117	9606.ENSP00000350941	9606.ENSP00000227507	0	0	0	0	0.044	0.285	0	0.824	0.869
HSD17B3	HSD17B6	1856269	1850063	9606.ENSP00000364412	9606.ENSP00000318631	0	0	0.392	0.643	0	0	0.8	0.699	0.868
JUN	PIK3CA	1855436	1845446	9606.ENSP00000360266	9606.ENSP00000263967	0	0	0	0	0.05	0.119	0	0.854	0.868
MYC	HPGDS	1856789	1847557	9606.ENSP00000367207	9606.ENSP00000295256	0	0	0	0	0	0	0	0.866	0.866
JUN	HPGDS	1855436	1847557	9606.ENSP00000360266	9606.ENSP00000295256	0	0	0	0	0	0	0	0.866	0.866
HSD3B1	HSD17B7	1855017	1844300	9606.ENSP00000358421	9606.ENSP00000254521	0	0	0	0	0.111	0.542	0	0.695	0.865
FOS	IGF1	1848822	1848439	9606.ENSP00000306245	9606.ENSP00000302665	0	0	0	0	0	0	0	0.86	0.86
OGT	PIK3CA	1855977	1845446	9606.ENSP00000362824	9606.ENSP00000263967	0	0	0	0	0.183	0	0.8	0.204	0.858
AKR1C3	HSD17B8	1857244	1856159	9606.ENSP00000369927	9606.ENSP00000363794	0.086	0	0	0	0.059	0	0.8	0.259	0.855
HSD17B7	HSD17B2	1844300	1842388	9606.ENSP00000254521	9606.ENSP00000199936	0	0	0	0	0	0	0.8	0.304	0.854
OGT	NOS3	1855977	1847875	9606.ENSP00000362824	9606.ENSP00000297494	0	0	0	0	0.053	0	0.8	0.277	0.851
FOS	AKT1	1848822	1846136	9606.ENSP00000306245	9606.ENSP00000270202	0	0	0	0	0.072	0.121	0	0.829	0.849
NR0B1	NCOR1	1856959	1846039	9606.ENSP00000368253	9606.ENSP00000268712	0	0	0	0	0	0.549	0	0.68	0.849
HSD17B8	HSD17B6	1856159	1850063	9606.ENSP00000363794	9606.ENSP00000318631	0	0	0.351	0.646	0	0	0.8	0.371	0.844
GNAS	SRC	1855402	1853652	9606.ENSP00000360141	9606.ENSP00000350941	0	0	0	0	0.051	0	0.8	0.238	0.842
MYC	IGF1	1856789	1848439	9606.ENSP00000367207	9606.ENSP00000302665	0	0	0	0	0	0	0	0.84	0.841
IGF1	CCND1	1848439	1843117	9606.ENSP00000302665	9606.ENSP00000227507	0	0	0	0	0	0	0	0.841	0.841
HSD17B8	HSD17B7	1856159	1844300	9606.ENSP00000363794	9606.ENSP00000254521	0	0	0	0	0	0	0.8	0.239	0.841
HSD17B6	HSD17B2	1850063	1842388	9606.ENSP00000318631	9606.ENSP00000199936	0	0	0.517	0.829	0.053	0	0.8	0.708	0.84
JUN	IGF1	1855436	1848439	9606.ENSP00000360266	9606.ENSP00000302665	0	0	0	0	0	0	0	0.839	0.839
HSD17B8	HSD17B2	1856159	1842388	9606.ENSP00000363794	9606.ENSP00000199936	0	0	0.309	0.65	0	0	0.8	0.308	0.837
NOS3	PIK3CA	1847875	1845446	9606.ENSP00000297494	9606.ENSP00000263967	0	0	0	0	0.074	0	0	0.83	0.836
IGF1	CYP19A1	1848439	1844790	9606.ENSP00000302665	9606.ENSP00000260433	0	0	0	0	0.051	0	0	0.833	0.835
POLE4	WDR5	1861462	1853715	9606.ENSP00000420176	9606.ENSP00000351446	0	0	0	0	0.055	0	0.72	0.423	0.833
PRL	CYP19A1	1848376	1844790	9606.ENSP00000302150	9606.ENSP00000260433	0	0	0	0	0.054	0	0	0.829	0.832
IGF1	NOS3	1848439	1847875	9606.ENSP00000302665	9606.ENSP00000297494	0	0	0	0	0	0	0	0.826	0.826
NCOR2	ESR2	1858893	1852756	9606.ENSP00000384018	9606.ENSP00000343925	0	0	0	0	0	0.699	0	0.444	0.825
HPGDS	AKT1	1847557	1846136	9606.ENSP00000295256	9606.ENSP00000270202	0	0	0	0	0	0.046	0	0.822	0.824
GNAS	IGF1R	1855402	1845984	9606.ENSP00000360141	9606.ENSP00000268035	0	0	0	0	0	0	0.8	0.151	0.822
SMARCE1	NCOR1	1850602	1846039	9606.ENSP00000323967	9606.ENSP00000268712	0	0	0	0	0.054	0.774	0	0.218	0.819
UGT1A4	UGT1A1	1855898	1848677	9606.ENSP00000362508	9606.ENSP00000304845	0	0	0	0.98	0.212	0.774	0	0.727	0.817
NR0B1	NRIP1	1856959	1850902	9606.ENSP00000368253	9606.ENSP00000327213	0	0	0	0	0	0.5	0	0.644	0.814
SRC	NOS3	1853652	1847875	9606.ENSP00000350941	9606.ENSP00000297494	0	0	0	0	0.055	0	0	0.81	0.813
MAPK11	MAPK1	1851615	1842512	9606.ENSP00000333685	9606.ENSP00000215832	0	0	0.365	0.933	0	0	0.8	0.596	0.812
MYC	MED1	1856789	1848202	9606.ENSP00000367207	9606.ENSP00000300651	0	0	0	0	0	0.774	0	0.194	0.81
UGT1A3	UGT1A1	1861363	1848677	9606.ENSP00000418532	9606.ENSP00000304845	0	0	0	0.981	0.168	0.774	0	0.861	0.808
HSD3B2	HSD17B7	1855019	1844300	9606.ENSP00000358424	9606.ENSP00000254521	0	0	0	0	0.111	0.542	0	0.568	0.808
FOS	PIK3CA	1848822	1845446	9606.ENSP00000306245	9606.ENSP00000263967	0	0	0	0	0.054	0	0	0.803	0.806
NR0B1	CYP19A1	1856959	1844790	9606.ENSP00000368253	9606.ENSP00000260433	0	0	0	0	0	0.079	0	0.796	0.804
UGT1A3	UGT1A4	1861363	1855898	9606.ENSP00000418532	9606.ENSP00000362508	0	0	0	0.989	0.138	0.774	0	0.758	0.799
CYP1A1	ESR1	1857086	1842435	9606.ENSP00000369050	9606.ENSP00000206249	0	0	0	0	0	0.079	0	0.786	0.795
JUN	NRIP1	1855436	1850902	9606.ENSP00000360266	9606.ENSP00000327213	0	0	0	0	0	0.36	0	0.673	0.782
NCOR2	NR0B1	1858893	1856959	9606.ENSP00000384018	9606.ENSP00000368253	0	0	0	0	0	0.549	0	0.532	0.78
HPGDS	ESR1	1847557	1842435	9606.ENSP00000295256	9606.ENSP00000206249	0	0	0	0	0	0.064	0	0.774	0.78
UGT1A10	UGT1A6	1852746	1848501	9606.ENSP00000343838	9606.ENSP00000303174	0	0	0	0.975	0	0.774	0	0.814	0.779
UGT1A1	UGT1A6	1848677	1848501	9606.ENSP00000304845	9606.ENSP00000303174	0	0	0	0.978	0	0.774	0	0.853	0.779
UGT1A3	UGT1A9	1861363	1853090	9606.ENSP00000418532	9606.ENSP00000346768	0	0	0	0.976	0	0.774	0	0.818	0.779
UGT1A9	UGT1A6	1853090	1848501	9606.ENSP00000346768	9606.ENSP00000303174	0	0	0	0.976	0	0.774	0	0.89	0.779
UGT1A3	UGT1A6	1861363	1848501	9606.ENSP00000418532	9606.ENSP00000303174	0	0	0	0.976	0	0.774	0	0.813	0.779
UGT1A7	UGT1A6	1855901	1848501	9606.ENSP00000362525	9606.ENSP00000303174	0	0	0	0.975	0	0.774	0	0.814	0.779
UGT1A3	UGT1A10	1861363	1852746	9606.ENSP00000418532	9606.ENSP00000343838	0	0	0	0.975	0	0.774	0	0.818	0.779
UGT1A7	UGT1A1	1855901	1848677	9606.ENSP00000362525	9606.ENSP00000304845	0	0	0	0.975	0	0.774	0	0.875	0.779
UGT1A3	UGT1A7	1861363	1855901	9606.ENSP00000418532	9606.ENSP00000362525	0	0	0	0.975	0	0.774	0	0.817	0.779
UGT1A9	UGT1A1	1853090	1848677	9606.ENSP00000346768	9606.ENSP00000304845	0	0	0	0.976	0	0.774	0	0.895	0.779
UGT1A10	UGT1A1	1852746	1848677	9606.ENSP00000343838	9606.ENSP00000304845	0	0	0	0.975	0	0.774	0	0.793	0.779
UGT1A4	UGT1A9	1855898	1853090	9606.ENSP00000362508	9606.ENSP00000346768	0	0	0	0.976	0	0.774	0	0.63	0.778
UGT1A4	UGT1A6	1855898	1848501	9606.ENSP00000362508	9606.ENSP00000303174	0	0	0	0.975	0	0.774	0	0.574	0.778
UGT1A4	UGT1A10	1855898	1852746	9606.ENSP00000362508	9606.ENSP00000343838	0	0	0	0.974	0	0.774	0	0.599	0.778
UGT1A7	UGT1A4	1855901	1855898	9606.ENSP00000362525	9606.ENSP00000362508	0	0	0	0.974	0	0.774	0	0.599	0.778
UGT1A7	UGT1A9	1855901	1853090	9606.ENSP00000362525	9606.ENSP00000346768	0	0	0	0.989	0	0.774	0	0.86	0.777
UGT1A9	UGT1A10	1853090	1852746	9606.ENSP00000346768	9606.ENSP00000343838	0	0	0	0.989	0	0.774	0	0.86	0.777
UGT1A7	UGT1A10	1855901	1852746	9606.ENSP00000362525	9606.ENSP00000343838	0	0	0	0.989	0	0.774	0	0.86	0.777
ESR2	CYP19A1	1852756	1844790	9606.ENSP00000343925	9606.ENSP00000260433	0	0	0	0	0.055	0.079	0	0.759	0.772
SRC	NR0B2	1853652	1844279	9606.ENSP00000350941	9606.ENSP00000254227	0	0	0	0	0	0.137	0	0.745	0.771
UGT2B15	UGT2B17	1852407	1850242	9606.ENSP00000341045	9606.ENSP00000320401	0	0	0	0.989	0.76	0	0	0.821	0.762
JUN	NCOR1	1855436	1846039	9606.ENSP00000360266	9606.ENSP00000268712	0	0	0	0	0	0.36	0	0.641	0.761
MYC	PRL	1856789	1848376	9606.ENSP00000367207	9606.ENSP00000302150	0	0	0	0	0	0	0	0.761	0.761
BRCA1	MYC	1861387	1856789	9606.ENSP00000418960	9606.ENSP00000367207	0	0	0	0	0	0.36	0	0.63	0.753
NCOA1	MAPK1	1850298	1842512	9606.ENSP00000320940	9606.ENSP00000215832	0	0	0	0	0.167	0.36	0	0.568	0.75
MYC	SMARCB1	1856789	1845291	9606.ENSP00000367207	9606.ENSP00000263121	0	0	0	0	0	0.36	0	0.622	0.748
SRC	HPGDS	1853652	1847557	9606.ENSP00000350941	9606.ENSP00000295256	0	0	0	0	0	0.044	0	0.748	0.748
CYP17A1	IGF1	1855129	1848439	9606.ENSP00000358903	9606.ENSP00000302665	0	0	0	0	0	0	0	0.73	0.73
HSD17B6	SULT2A1	1850063	1842878	9606.ENSP00000318631	9606.ENSP00000222002	0	0	0	0	0.22	0	0	0.663	0.726
NCOA3	NR0B2	1855597	1844279	9606.ENSP00000361066	9606.ENSP00000254227	0	0	0	0	0	0.678	0	0.182	0.725
NCOA2	NRIP1	1860191	1850902	9606.ENSP00000399968	9606.ENSP00000327213	0	0	0	0	0.047	0.173	0	0.672	0.719
SMARCE1	ESR1	1850602	1842435	9606.ENSP00000323967	9606.ENSP00000206249	0	0	0	0	0	0.407	0	0.544	0.718
JUN	PRL	1855436	1848376	9606.ENSP00000360266	9606.ENSP00000302150	0	0	0	0	0	0	0	0.716	0.717
NR0B1	NCOA1	1856959	1850298	9606.ENSP00000368253	9606.ENSP00000320940	0	0	0	0	0	0.565	0	0.375	0.716
HSD17B1	HSD3B1	1863967	1855017	9606.ENSP00000466799	9606.ENSP00000358421	0.065	0	0	0	0.073	0.049	0	0.695	0.715
BRCA1	CCND1	1861387	1843117	9606.ENSP00000418960	9606.ENSP00000227507	0	0	0	0	0	0.359	0	0.574	0.715
NCOA3	MAPK1	1855597	1842512	9606.ENSP00000361066	9606.ENSP00000215832	0	0	0	0	0	0.36	0	0.56	0.707
NCOR2	FOS	1858893	1848822	9606.ENSP00000384018	9606.ENSP00000306245	0	0	0	0	0.052	0.324	0	0.577	0.705
HPGDS	MAPK1	1847557	1842512	9606.ENSP00000295256	9606.ENSP00000215832	0	0	0	0	0	0.052	0	0.701	0.704
GSTP1	JUN	1858630	1855436	9606.ENSP00000381607	9606.ENSP00000360266	0	0	0	0	0	0.065	0	0.69	0.698
HSD17B1	CYP17A1	1863967	1855129	9606.ENSP00000466799	9606.ENSP00000358903	0	0	0	0	0.054	0.096	0	0.669	0.692
NCOA1	NR0B2	1850298	1844279	9606.ENSP00000320940	9606.ENSP00000254227	0	0	0	0	0	0.565	0	0.321	0.692
PRL	CCND1	1848376	1843117	9606.ENSP00000302150	9606.ENSP00000227507	0	0	0	0	0	0	0	0.691	0.691
NCOA2	FOS	1860191	1848822	9606.ENSP00000399968	9606.ENSP00000306245	0	0	0	0	0	0.326	0	0.56	0.691
NCOR1	NR0B2	1846039	1844279	9606.ENSP00000268712	9606.ENSP00000254227	0	0	0	0	0	0.549	0	0.341	0.69
NCOA2	NR0B1	1860191	1856959	9606.ENSP00000399968	9606.ENSP00000368253	0	0	0	0	0	0.565	0	0.301	0.683
NR0B1	CYP17A1	1856959	1855129	9606.ENSP00000368253	9606.ENSP00000358903	0	0	0	0	0	0.079	0	0.666	0.679
FOS	PRL	1848822	1848376	9606.ENSP00000306245	9606.ENSP00000302150	0	0	0	0	0	0	0	0.675	0.675
ESR2	AKT1	1852756	1846136	9606.ENSP00000343925	9606.ENSP00000270202	0	0	0	0	0	0.371	0	0.498	0.671
NCOA2	NR0B2	1860191	1844279	9606.ENSP00000399968	9606.ENSP00000254227	0	0	0	0	0	0.565	0	0.276	0.671
BRCA1	AKT1	1861387	1846136	9606.ENSP00000418960	9606.ENSP00000270202	0	0	0	0	0	0.36	0	0.504	0.669
ESR2	CCND1	1852756	1843117	9606.ENSP00000343925	9606.ENSP00000227507	0	0	0	0	0.042	0.059	0	0.662	0.669
ESR2	IGF1R	1852756	1845984	9606.ENSP00000343925	9606.ENSP00000268035	0	0	0	0	0	0.137	0	0.628	0.666
TADA3	ESR1	1848982	1842435	9606.ENSP00000307684	9606.ENSP00000206249	0	0	0	0	0.052	0.36	0	0.492	0.665
CYP17A1	SULT2A1	1855129	1842878	9606.ENSP00000358903	9606.ENSP00000222002	0	0	0	0	0	0	0	0.663	0.663
FOS	HPGDS	1848822	1847557	9606.ENSP00000306245	9606.ENSP00000295256	0	0	0	0	0	0	0	0.663	0.663
CYP17A1	ESR1	1855129	1842435	9606.ENSP00000358903	9606.ENSP00000206249	0	0	0	0	0.045	0.079	0	0.646	0.662
HSD17B6	ESR1	1850063	1842435	9606.ENSP00000318631	9606.ENSP00000206249	0	0	0	0	0	0.044	0	0.66	0.661
PRL	SULT2A1	1848376	1842878	9606.ENSP00000302150	9606.ENSP00000222002	0	0	0	0	0	0	0	0.659	0.659
AKR1C1	HSD17B3	1857297	1856269	9606.ENSP00000370254	9606.ENSP00000364412	0	0	0	0	0.046	0	0	0.656	0.657
NCOR2	NR0B2	1858893	1844279	9606.ENSP00000384018	9606.ENSP00000254227	0	0	0	0	0	0.549	0	0.262	0.653
HSD17B6	PRL	1850063	1848376	9606.ENSP00000318631	9606.ENSP00000302150	0	0	0	0	0	0	0	0.652	0.652
NR0B1	NCOA3	1856959	1855597	9606.ENSP00000368253	9606.ENSP00000361066	0	0	0	0	0	0.518	0	0.277	0.636
CYP19A1	SULT2A1	1844790	1842878	9606.ENSP00000260433	9606.ENSP00000222002	0	0	0	0	0	0	0	0.629	0.629
HSD17B6	IGF1	1850063	1848439	9606.ENSP00000318631	9606.ENSP00000302665	0	0	0	0	0	0	0	0.629	0.629
NCOA1	FOS	1850298	1848822	9606.ENSP00000320940	9606.ENSP00000306245	0	0	0	0	0	0.36	0	0.441	0.627
JUN	NR0B2	1855436	1844279	9606.ENSP00000360266	9606.ENSP00000254227	0	0	0	0	0	0.076	0	0.613	0.627
JUN	NCOA1	1855436	1850298	9606.ENSP00000360266	9606.ENSP00000320940	0	0	0	0	0	0.36	0	0.442	0.627
BRCA1	JUN	1861387	1855436	9606.ENSP00000418960	9606.ENSP00000360266	0	0	0	0	0	0.36	0	0.441	0.627
FOS	NCOR1	1848822	1846039	9606.ENSP00000306245	9606.ENSP00000268712	0	0	0	0	0.054	0	0	0.621	0.626
KANSL3	KANSL1L	1859962	1846743	9606.ENSP00000396749	9606.ENSP00000281772	0	0	0	0	0.106	0	0	0.595	0.622
MAPK11	PIK3CA	1851615	1845446	9606.ENSP00000333685	9606.ENSP00000263967	0	0	0	0	0.054	0.17	0	0.552	0.617
FOS	NOS3	1848822	1847875	9606.ENSP00000306245	9606.ENSP00000297494	0	0	0	0	0.046	0	0	0.612	0.614
HSD17B1	AKR1C1	1863967	1857297	9606.ENSP00000466799	9606.ENSP00000370254	0.086	0	0	0	0.059	0	0	0.58	0.607
BRCA1	NCOA3	1861387	1855597	9606.ENSP00000418960	9606.ENSP00000361066	0	0	0	0	0	0.36	0	0.409	0.605
CYP17A1	SRC	1855129	1853652	9606.ENSP00000358903	9606.ENSP00000350941	0.052	0	0	0	0.053	0	0	0.592	0.602
MYC	NCOA1	1856789	1850298	9606.ENSP00000367207	9606.ENSP00000320940	0	0	0	0	0	0	0	0.599	0.599
AKR1C1	HSD17B2	1857297	1842388	9606.ENSP00000370254	9606.ENSP00000199936	0	0	0	0	0.049	0	0	0.595	0.598
ESR2	NRIP1	1852756	1850902	9606.ENSP00000343925	9606.ENSP00000327213	0	0	0	0	0	0.391	0	0.364	0.597
PIK3CA	NR0B2	1845446	1844279	9606.ENSP00000263967	9606.ENSP00000254227	0	0	0	0	0	0	0	0.59	0.59
UGT2B15	ESR1	1852407	1842435	9606.ENSP00000341045	9606.ENSP00000206249	0	0	0	0	0	0.325	0	0.418	0.59
ESR2	PELP1	1852756	1848285	9606.ENSP00000343925	9606.ENSP00000301396	0	0	0	0	0	0.343	0	0.396	0.587
IGF1R	CCND1	1845984	1843117	9606.ENSP00000268035	9606.ENSP00000227507	0	0	0	0	0	0	0	0.582	0.582
NRIP1	NCOR1	1850902	1846039	9606.ENSP00000327213	9606.ENSP00000268712	0	0	0	0	0.048	0	0	0.578	0.581
IGF1	SULT2A1	1848439	1842878	9606.ENSP00000302665	9606.ENSP00000222002	0	0	0	0	0.046	0	0	0.577	0.579
HPGDS	CCND1	1847557	1843117	9606.ENSP00000295256	9606.ENSP00000227507	0	0	0	0	0	0	0	0.577	0.577
NCOR2	CCND1	1858893	1843117	9606.ENSP00000384018	9606.ENSP00000227507	0	0	0	0	0	0	0	0.576	0.576
NCOA1	CCND1	1850298	1843117	9606.ENSP00000320940	9606.ENSP00000227507	0	0	0	0	0	0.36	0	0.364	0.575
NCOA3	JUN	1855597	1855436	9606.ENSP00000361066	9606.ENSP00000360266	0	0	0	0	0	0.324	0	0.393	0.572
NOS3	MAPK1	1847875	1842512	9606.ENSP00000297494	9606.ENSP00000215832	0	0	0	0	0.052	0	0	0.564	0.569
JUN	GNAS	1855436	1855402	9606.ENSP00000360266	9606.ENSP00000360141	0	0	0	0	0	0	0	0.569	0.569
CYP1B1	ESR1	1844805	1842435	9606.ENSP00000260630	9606.ENSP00000206249	0	0	0	0	0	0.079	0	0.549	0.566
NCOR2	JUN	1858893	1855436	9606.ENSP00000384018	9606.ENSP00000360266	0	0	0	0	0	0.324	0	0.381	0.564
MYC	WDR5	1856789	1853715	9606.ENSP00000367207	9606.ENSP00000351446	0	0	0	0	0	0.094	0	0.537	0.563
MYC	IGF1R	1856789	1845984	9606.ENSP00000367207	9606.ENSP00000268035	0	0	0	0	0	0.065	0	0.549	0.56
NCOA2	JUN	1860191	1855436	9606.ENSP00000399968	9606.ENSP00000360266	0	0	0	0	0	0.324	0	0.373	0.559
NCOA3	FOS	1855597	1848822	9606.ENSP00000361066	9606.ENSP00000306245	0	0	0	0	0	0.326	0	0.37	0.557
CYP17A1	COMT	1855129	1854135	9606.ENSP00000358903	9606.ENSP00000354511	0.049	0	0	0	0.054	0	0	0.547	0.556
AKT1	IGF1R	1846136	1845984	9606.ENSP00000270202	9606.ENSP00000268035	0	0	0	0.617	0.054	0.29	0	0.956	0.555
AKT1	MAPK1	1846136	1842512	9606.ENSP00000270202	9606.ENSP00000215832	0	0	0	0.643	0.084	0.292	0	0.961	0.555
COMT	CYP19A1	1854135	1844790	9606.ENSP00000354511	9606.ENSP00000260433	0.049	0	0	0	0.05	0	0	0.545	0.553
COMT	FOS	1854135	1848822	9606.ENSP00000354511	9606.ENSP00000306245	0	0	0	0	0	0	0	0.552	0.553
CYP3A4	IGF1R	1852052	1845984	9606.ENSP00000337915	9606.ENSP00000268035	0.052	0	0	0	0.053	0	0	0.541	0.553
KANSL3	TADA3	1859962	1848982	9606.ENSP00000396749	9606.ENSP00000307684	0	0	0	0	0.066	0.541	0	0	0.552
CYP17A1	HSD17B7	1855129	1844300	9606.ENSP00000358903	9606.ENSP00000254521	0	0	0	0	0.055	0.275	0	0.395	0.549
NOS3	CYP19A1	1847875	1844790	9606.ENSP00000297494	9606.ENSP00000260433	0	0	0	0	0.051	0.042	0	0.544	0.549
HSD17B3	HSD17B7	1856269	1844300	9606.ENSP00000364412	9606.ENSP00000254521	0	0	0	0	0.054	0	0	0.542	0.548
HSD3B2	PRL	1855019	1848376	9606.ENSP00000358424	9606.ENSP00000302150	0	0	0	0	0	0	0	0.547	0.547
KAT8	NCOR1	1860574	1846039	9606.ENSP00000406037	9606.ENSP00000268712	0	0	0	0	0.094	0	0	0.521	0.547
MAPK11	IGF1R	1851615	1845984	9606.ENSP00000333685	9606.ENSP00000268035	0	0	0	0	0.053	0.292	0	0.379	0.547
IGF1R	CYP19A1	1845984	1844790	9606.ENSP00000268035	9606.ENSP00000260433	0.052	0	0	0	0.053	0	0	0.532	0.543
JUN	IGF1R	1855436	1845984	9606.ENSP00000360266	9606.ENSP00000268035	0	0	0	0	0	0.102	0	0.51	0.541
BRCA1	PIK3CA	1861387	1845446	9606.ENSP00000418960	9606.ENSP00000263967	0	0	0	0	0.057	0	0	0.531	0.538
FOS	IGF1R	1848822	1845984	9606.ENSP00000306245	9606.ENSP00000268035	0	0	0	0	0	0.09	0	0.512	0.537
AKT1	CYP19A1	1846136	1844790	9606.ENSP00000270202	9606.ENSP00000260433	0	0	0	0	0	0.083	0	0.514	0.535
HSD17B6	HPGDS	1850063	1847557	9606.ENSP00000318631	9606.ENSP00000295256	0	0	0	0	0	0	0	0.531	0.531
KANSL1L	ADAM11	1846743	1842393	9606.ENSP00000281772	9606.ENSP00000200557	0	0	0	0	0.05	0	0	0.527	0.531
SRD5A1	SULT2A1	1846366	1842878	9606.ENSP00000274192	9606.ENSP00000222002	0	0	0	0	0	0	0	0.529	0.529
NR0B1	CYP11B1	1856959	1847352	9606.ENSP00000368253	9606.ENSP00000292427	0	0	0	0	0	0.079	0	0.51	0.529
SMARCB1	ESR1	1845291	1842435	9606.ENSP00000263121	9606.ENSP00000206249	0	0	0	0	0	0.342	0	0.303	0.523
UGT1A1	HPGDS	1848677	1847557	9606.ENSP00000304845	9606.ENSP00000295256	0	0	0	0	0	0	0	0.521	0.521
MYC	TADA3	1856789	1848982	9606.ENSP00000367207	9606.ENSP00000307684	0	0	0	0	0	0	0	0.52	0.52
PELP1	CCND1	1848285	1843117	9606.ENSP00000301396	9606.ENSP00000227507	0	0	0	0	0	0	0	0.52	0.52
CYP17A1	ESR2	1855129	1852756	9606.ENSP00000358903	9606.ENSP00000343925	0	0	0	0	0.053	0.079	0	0.493	0.519
AKT1	SMARCB1	1846136	1845291	9606.ENSP00000270202	9606.ENSP00000263121	0	0	0	0	0.102	0.349	0	0.242	0.519
COMT	ESR1	1854135	1842435	9606.ENSP00000354511	9606.ENSP00000206249	0	0	0	0	0	0.07	0	0.503	0.518
IGF1	HPGDS	1848439	1847557	9606.ENSP00000302665	9606.ENSP00000295256	0	0	0	0	0.089	0	0	0.493	0.518
NCOR1	SMARCB1	1846039	1845291	9606.ENSP00000268712	9606.ENSP00000263121	0	0	0	0	0.088	0.36	0	0.239	0.517
KANSL3	DPY30	1859962	1847527	9606.ENSP00000396749	9606.ENSP00000295066	0	0	0	0	0	0.496	0	0.081	0.517
BRCA1	MAPK1	1861387	1842512	9606.ENSP00000418960	9606.ENSP00000215832	0	0	0	0	0	0.36	0	0.277	0.517
SRC	PRL	1853652	1848376	9606.ENSP00000350941	9606.ENSP00000302150	0	0	0	0	0	0	0	0.516	0.516
UGT1A6	HPGDS	1848501	1847557	9606.ENSP00000303174	9606.ENSP00000295256	0	0	0	0	0	0	0	0.514	0.514
CYP3A4	ESR1	1852052	1842435	9606.ENSP00000337915	9606.ENSP00000206249	0	0	0	0	0	0.079	0	0.493	0.513
HSD3B1	CYP1B1	1855017	1844805	9606.ENSP00000358421	9606.ENSP00000260630	0.063	0	0	0	0.053	0.152	0.274	0.246	0.513
UGT1A7	HPGDS	1855901	1847557	9606.ENSP00000362525	9606.ENSP00000295256	0	0	0	0	0	0	0	0.511	0.511
CYP17A1	PRL	1855129	1848376	9606.ENSP00000358903	9606.ENSP00000302150	0	0	0	0	0	0	0	0.51	0.51
HSD17B6	NOS3	1850063	1847875	9606.ENSP00000318631	9606.ENSP00000297494	0	0	0	0	0.052	0	0	0.505	0.51
HSD17B1	HSD3B2	1863967	1855019	9606.ENSP00000466799	9606.ENSP00000358424	0.065	0	0	0	0.073	0.049	0	0.474	0.509
NCOA1	HPGDS	1850298	1847557	9606.ENSP00000320940	9606.ENSP00000295256	0	0	0	0	0	0	0	0.505	0.505
NCOA3	SRC	1855597	1853652	9606.ENSP00000361066	9606.ENSP00000350941	0	0	0	0	0.044	0	0	0.504	0.505
HPGDS	PIK3CA	1847557	1845446	9606.ENSP00000295256	9606.ENSP00000263967	0	0	0	0	0	0	0	0.505	0.505
PRL	AKT1	1848376	1846136	9606.ENSP00000302150	9606.ENSP00000270202	0	0	0	0	0	0	0	0.504	0.504
ESR2	IGF1	1852756	1848439	9606.ENSP00000343925	9606.ENSP00000302665	0	0	0	0	0	0	0	0.504	0.504
ESR2	PRL	1852756	1848376	9606.ENSP00000343925	9606.ENSP00000302150	0	0	0	0	0.054	0	0	0.496	0.503
KANSL3	ADAM11	1859962	1842393	9606.ENSP00000396749	9606.ENSP00000200557	0	0	0	0	0	0	0	0.502	0.502
UGT1A4	HPGDS	1855898	1847557	9606.ENSP00000362508	9606.ENSP00000295256	0	0	0	0	0	0	0	0.501	0.501
UGT1A10	HPGDS	1852746	1847557	9606.ENSP00000343838	9606.ENSP00000295256	0	0	0	0	0	0	0	0.501	0.501
NRIP1	NR0B2	1850902	1844279	9606.ENSP00000327213	9606.ENSP00000254227	0	0	0	0	0	0.251	0	0.359	0.5
HSD3B2	CYP1B1	1855019	1844805	9606.ENSP00000358424	9606.ENSP00000260630	0.063	0	0	0	0.053	0.152	0.274	0.223	0.498
SRC	NCOA1	1853652	1850298	9606.ENSP00000350941	9606.ENSP00000320940	0	0	0	0	0	0	0	0.498	0.497
JUN	HSD17B6	1855436	1850063	9606.ENSP00000360266	9606.ENSP00000318631	0	0	0	0	0	0	0	0.493	0.493
BRCA1	CYP19A1	1861387	1844790	9606.ENSP00000418960	9606.ENSP00000260433	0	0	0	0	0	0	0	0.492	0.491
MAPK11	CCND1	1851615	1843117	9606.ENSP00000333685	9606.ENSP00000227507	0	0	0	0	0.053	0.36	0	0.223	0.489
HSD17B6	AKT1	1850063	1846136	9606.ENSP00000318631	9606.ENSP00000270202	0	0	0	0	0	0	0	0.49	0.489
ESR2	HSD17B6	1852756	1850063	9606.ENSP00000343925	9606.ENSP00000318631	0	0	0	0	0	0.044	0	0.481	0.482
NR0B1	HSD17B6	1856959	1850063	9606.ENSP00000368253	9606.ENSP00000318631	0	0	0	0	0	0.044	0	0.481	0.482
BRCA1	GSTP1	1861387	1858630	9606.ENSP00000418960	9606.ENSP00000381607	0	0	0	0	0	0	0	0.481	0.481
AKR1C1	HSD17B6	1857297	1850063	9606.ENSP00000370254	9606.ENSP00000318631	0	0	0	0	0	0	0	0.481	0.481
SRC	CYP19A1	1853652	1844790	9606.ENSP00000350941	9606.ENSP00000260433	0.052	0	0	0	0.053	0	0	0.463	0.476
FOS	SMARCB1	1848822	1845291	9606.ENSP00000306245	9606.ENSP00000263121	0	0	0	0	0	0.395	0	0.168	0.475
KAT8	ESR1	1860574	1842435	9606.ENSP00000406037	9606.ENSP00000206249	0	0	0	0	0	0.042	0	0.47	0.471
CYP3A4	SULT2A1	1852052	1842878	9606.ENSP00000337915	9606.ENSP00000222002	0	0	0	0	0.089	0	0	0.439	0.467
BRCA1	SMARCB1	1861387	1845291	9606.ENSP00000418960	9606.ENSP00000263121	0	0	0	0	0	0.325	0	0.242	0.466
JUN	TFF1	1855436	1847287	9606.ENSP00000360266	9606.ENSP00000291527	0	0	0	0	0	0.325	0	0.241	0.466
UGT1A3	HPGDS	1861363	1847557	9606.ENSP00000418532	9606.ENSP00000295256	0	0	0	0	0	0	0	0.465	0.465
JUN	CYP19A1	1855436	1844790	9606.ENSP00000360266	9606.ENSP00000260433	0	0	0	0	0	0.085	0	0.44	0.465
KAT8	NCOA3	1860574	1855597	9606.ENSP00000406037	9606.ENSP00000361066	0	0	0	0	0	0	0	0.463	0.463
GSTA1	UGT1A6	1851878	1848501	9606.ENSP00000335620	9606.ENSP00000303174	0	0	0	0	0.053	0	0	0.455	0.462
CYP1A1	JUN	1857086	1855436	9606.ENSP00000369050	9606.ENSP00000360266	0	0	0	0	0	0.097	0	0.426	0.459
GSTP1	MAPK1	1858630	1842512	9606.ENSP00000381607	9606.ENSP00000215832	0	0	0	0	0	0.343	0	0.21	0.459
COMT	CYP3A4	1854135	1852052	9606.ENSP00000354511	9606.ENSP00000337915	0.049	0	0	0	0.05	0	0	0.448	0.458
UGT1A9	HPGDS	1853090	1847557	9606.ENSP00000346768	9606.ENSP00000295256	0	0	0	0	0	0	0	0.457	0.457
WDR5	ESR1	1853715	1842435	9606.ENSP00000351446	9606.ENSP00000206249	0	0	0	0	0	0.36	0	0.185	0.456
UGT1A1	SULT2A1	1848677	1842878	9606.ENSP00000304845	9606.ENSP00000222002	0	0	0	0	0.228	0	0	0.323	0.455
HSD17B1	ESR1	1863967	1842435	9606.ENSP00000466799	9606.ENSP00000206249	0	0	0	0	0	0	0	0.455	0.455
SRC	HSD17B6	1853652	1850063	9606.ENSP00000350941	9606.ENSP00000318631	0	0	0	0	0.053	0.12	0	0.398	0.454
GSTP1	ESR1	1858630	1842435	9606.ENSP00000381607	9606.ENSP00000206249	0	0	0	0	0	0.064	0	0.441	0.454
PRL	IGF1R	1848376	1845984	9606.ENSP00000302150	9606.ENSP00000268035	0	0	0	0	0	0	0	0.454	0.454
MYC	MCRS1	1856789	1853470	9606.ENSP00000367207	9606.ENSP00000349640	0	0	0	0	0	0	0	0.453	0.453
HSD3B2	SULT2A1	1855019	1842878	9606.ENSP00000358424	9606.ENSP00000222002	0	0	0	0	0.055	0	0	0.443	0.451
CYP17A1	NR0B2	1855129	1844279	9606.ENSP00000358903	9606.ENSP00000254227	0	0	0	0	0.042	0.079	0	0.428	0.451
MYC	ESR2	1856789	1852756	9606.ENSP00000367207	9606.ENSP00000343925	0	0	0	0	0	0	0	0.449	0.449
PRL	MAPK1	1848376	1842512	9606.ENSP00000302150	9606.ENSP00000215832	0	0	0	0	0.051	0	0	0.443	0.449
GSTA1	UGT1A1	1851878	1848677	9606.ENSP00000335620	9606.ENSP00000304845	0	0	0	0	0.043	0	0	0.448	0.449
NCOA3	SMARCE1	1855597	1850602	9606.ENSP00000361066	9606.ENSP00000323967	0	0	0	0	0	0.326	0	0.214	0.448
NR0B1	HSD3B2	1856959	1855019	9606.ENSP00000368253	9606.ENSP00000358424	0	0	0	0	0	0	0	0.448	0.448
PIK3CA	CYP19A1	1845446	1844790	9606.ENSP00000263967	9606.ENSP00000260433	0	0	0	0	0	0.042	0	0.446	0.447
UGT1A1	GSTT1	1848677	1843934	9606.ENSP00000304845	9606.ENSP00000248935	0	0	0	0	0	0	0	0.447	0.447
HPGDS	NCOR1	1847557	1846039	9606.ENSP00000295256	9606.ENSP00000268712	0	0	0	0	0	0	0	0.446	0.446
NCOA2	HPGDS	1860191	1847557	9606.ENSP00000399968	9606.ENSP00000295256	0	0	0	0	0	0	0	0.446	0.446
BRCA1	NCOA2	1861387	1860191	9606.ENSP00000418960	9606.ENSP00000399968	0	0	0	0	0	0.36	0	0.17	0.446
CYP19A1	CCND1	1844790	1843117	9606.ENSP00000260433	9606.ENSP00000227507	0	0	0	0	0.044	0	0	0.445	0.446
HSD17B6	DHDH	1850063	1842829	9606.ENSP00000318631	9606.ENSP00000221403	0	0	0	0	0.049	0	0	0.441	0.445
PIK3CA	GSTM2	1845446	1843595	9606.ENSP00000263967	9606.ENSP00000241337	0	0	0	0	0	0	0	0.444	0.444
FOS	CYP19A1	1848822	1844790	9606.ENSP00000306245	9606.ENSP00000260433	0	0	0	0	0	0	0	0.443	0.443
SULT2A1	ESR1	1842878	1842435	9606.ENSP00000222002	9606.ENSP00000206249	0	0	0	0	0	0	0	0.443	0.443
BRCA1	MED1	1861387	1848202	9606.ENSP00000418960	9606.ENSP00000300651	0	0	0	0	0	0.36	0	0.166	0.443
COMT	GSTM1	1854135	1849425	9606.ENSP00000354511	9606.ENSP00000311469	0	0	0	0	0	0	0	0.443	0.443
GSTM1	UGT1A1	1849425	1848677	9606.ENSP00000311469	9606.ENSP00000304845	0	0	0	0	0	0	0	0.443	0.443
GSTM1	UGT1A6	1849425	1848501	9606.ENSP00000311469	9606.ENSP00000303174	0	0	0	0	0	0	0	0.442	0.442
NCOA3	HPGDS	1855597	1847557	9606.ENSP00000361066	9606.ENSP00000295256	0	0	0	0	0	0	0	0.442	0.442
GSTP1	UGT1A6	1858630	1848501	9606.ENSP00000381607	9606.ENSP00000303174	0	0	0	0	0	0	0	0.442	0.442
HSD17B6	FOS	1850063	1848822	9606.ENSP00000318631	9606.ENSP00000306245	0	0	0	0	0	0	0	0.441	0.441
JUN	HCFC1	1855436	1849194	9606.ENSP00000360266	9606.ENSP00000309555	0	0	0	0	0	0.36	0	0.162	0.441
SMARCE1	NCOA1	1850602	1850298	9606.ENSP00000323967	9606.ENSP00000320940	0	0	0	0	0.042	0.36	0	0.162	0.441
BRCA1	HPGDS	1861387	1847557	9606.ENSP00000418960	9606.ENSP00000295256	0	0	0	0	0	0	0	0.441	0.441
GNAS	PRL	1855402	1848376	9606.ENSP00000360141	9606.ENSP00000302150	0	0	0	0	0	0	0	0.441	0.441
BRCA1	NCOA1	1861387	1850298	9606.ENSP00000418960	9606.ENSP00000320940	0	0	0	0	0	0.325	0	0.205	0.44
COMT	GSTT1	1854135	1843934	9606.ENSP00000354511	9606.ENSP00000248935	0	0	0	0	0.06	0	0	0.429	0.44
GSTP1	UGT1A1	1858630	1848677	9606.ENSP00000381607	9606.ENSP00000304845	0	0	0	0	0	0	0	0.438	0.438
SRC	UGT2B15	1853652	1852407	9606.ENSP00000350941	9606.ENSP00000341045	0	0	0	0	0	0.065	0	0.422	0.437
MYC	NOS3	1856789	1847875	9606.ENSP00000367207	9606.ENSP00000297494	0	0	0	0	0	0	0	0.437	0.437
SRC	UGT2B7	1853652	1848674	9606.ENSP00000350941	9606.ENSP00000304811	0	0	0	0	0	0.065	0	0.422	0.437
NCOA3	CYP19A1	1855597	1844790	9606.ENSP00000361066	9606.ENSP00000260433	0	0	0	0	0	0	0	0.429	0.429
BRCA1	TADA3	1861387	1848982	9606.ENSP00000418960	9606.ENSP00000307684	0	0	0	0	0	0.359	0	0.143	0.428
UGT1A6	GSTT1	1848501	1843934	9606.ENSP00000303174	9606.ENSP00000248935	0	0	0	0	0.045	0	0	0.424	0.427
TADA3	PIK3CA	1848982	1845446	9606.ENSP00000307684	9606.ENSP00000263967	0	0	0	0	0.05	0.296	0	0.21	0.425
NCOA1	PELP1	1850298	1848285	9606.ENSP00000320940	9606.ENSP00000301396	0	0	0	0	0	0	0	0.424	0.424
HSD3B2	NR0B2	1855019	1844279	9606.ENSP00000358424	9606.ENSP00000254227	0	0	0	0	0	0	0	0.423	0.422
HPGDS	UGT2A3	1847557	1844068	9606.ENSP00000295256	9606.ENSP00000251566	0	0	0	0	0	0	0	0.422	0.422
UGT1A6	EPHX1	1848501	1846231	9606.ENSP00000303174	9606.ENSP00000272167	0	0	0	0	0.066	0	0	0.405	0.421
NCOA2	SMARCE1	1860191	1850602	9606.ENSP00000399968	9606.ENSP00000323967	0	0	0	0	0.052	0.326	0	0.166	0.42
CYP1A1	ESR2	1857086	1852756	9606.ENSP00000369050	9606.ENSP00000343925	0	0	0	0	0.047	0.079	0	0.389	0.417
HSD3B1	SULT2A1	1855017	1842878	9606.ENSP00000358421	9606.ENSP00000222002	0	0	0	0	0.055	0	0	0.409	0.417
GSTM3	ESR1	1844453	1842435	9606.ENSP00000256594	9606.ENSP00000206249	0	0	0	0	0	0.336	0	0.152	0.413
NR0B2	SULT2A1	1844279	1842878	9606.ENSP00000254227	9606.ENSP00000222002	0	0	0	0	0.145	0.093	0	0.304	0.413
NCOR1	PIK3CA	1846039	1845446	9606.ENSP00000268712	9606.ENSP00000263967	0	0	0	0	0.279	0.05	0	0.211	0.412
NCOR2	HPGDS	1858893	1847557	9606.ENSP00000384018	9606.ENSP00000295256	0	0	0	0	0	0	0	0.411	0.411
SRC	SMARCB1	1853652	1845291	9606.ENSP00000350941	9606.ENSP00000263121	0	0	0	0	0.042	0.326	0	0.161	0.411
SULT1E1	ESR1	1843091	1842435	9606.ENSP00000226444	9606.ENSP00000206249	0	0	0	0	0	0	0	0.41	0.41
PRL	PIK3CA	1848376	1845446	9606.ENSP00000302150	9606.ENSP00000263967	0	0	0	0	0	0	0	0.408	0.408
GNAS	IGF1	1855402	1848439	9606.ENSP00000360141	9606.ENSP00000302665	0	0	0	0	0	0	0	0.408	0.408
NCOA1	CYP19A1	1850298	1844790	9606.ENSP00000320940	9606.ENSP00000260433	0	0	0	0	0	0	0	0.408	0.408
NCOR2	MYC	1858893	1856789	9606.ENSP00000384018	9606.ENSP00000367207	0	0	0	0	0	0.095	0	0.371	0.407
NCOA2	SRC	1860191	1853652	9606.ENSP00000399968	9606.ENSP00000350941	0	0	0	0	0	0	0	0.407	0.407
NOS3	HPGDS	1847875	1847557	9606.ENSP00000297494	9606.ENSP00000295256	0	0	0	0	0	0	0	0.405	0.405
GSTP1	COMT	1858630	1854135	9606.ENSP00000381607	9606.ENSP00000354511	0	0	0	0	0.054	0	0	0.395	0.403
MYC	CYP19A1	1856789	1844790	9606.ENSP00000367207	9606.ENSP00000260433	0	0	0	0	0	0	0	0.4	0.4
